# Supplementary material
Source: HighWire-hosted journal article supplement (https://srh.bmj.com/highwire/filestream/142292/field_highwire_adjunct_files/0/bmjsrh-2021-201399supp001_data_supplement.pdf)
Supplement: bmjsrh-2021-201399supp001_data_supplement.pdf [file bmjsrh-2021-201399supp001_data_supplement.pdf]

**Supplementary Table 1. Search strategy**

| Database       | Search Terms                                                                                                                                                                                                                                                                                                                                                                                                                                                                        |
|----------------|-------------------------------------------------------------------------------------------------------------------------------------------------------------------------------------------------------------------------------------------------------------------------------------------------------------------------------------------------------------------------------------------------------------------------------------------------------------------------------------|
| PsycINFO       | 1 Female Genital Mutilation;2 Female Circumcision;3 Female Genital Cutting; 4 Female Genital Alteration; 5 or/1-4; 6<br>Limit 5 by 2009-2020                                                                                                                                                                                                                                                                                                                                        |
| Embase         | 1 'female genital mutilation'/exp; 2 'female genital mutilation'; 3 or/1-2; 4 'female'/exp; 5 female; 6 or/4-5; 7 genital; 8<br>'mutilation'/exp; 9 mutilation;10- or/8-9;11 7 and 10; 12 11 and 6; 13 Limit 12 by 2009-2020                                                                                                                                                                                                                                                        |
| Ovid Medline   | 1 female.mp.; 2 Girl*.mp.; 3 wom?n.mp.; 4 or/1-3; 5 adj3 genital*.mp.; 6 adj3 mutilation.mp.; 7 adj3 circumcis*.mp.;<br>8 adj3 cut*.mp.; 9 adj3 alter.mp.; 10 adj3 alteration.mp.; 11 or/5-10 (1448); 12 4 and 11; 13 Female Genital<br>Mutilation.mp.; 14 Female Circumcision.mp.; 15 Female Genital Cutting.mp.; 16 Female Genital Alteration.mp. (1629);<br>17 or/13-16; 18 Circumcision, Female.sh. / (1322); 19 12 or 17 or 18 (2024); 20 limit 4 to yr="2009 -Current" (1066) |
| Web of Science | 1 Female Genital Mutilation; 2 Female Circumcision;3 Female Genital Cutting; 4 Female Genital Alteration, 5 or/1-4; 6<br>Limit 5 by 2009-2020                                                                                                                                                                                                                                                                                                                                       |

**Supplementary Table 2: Characteristics of studies included in the systematic review**

|                       | Author (year)                         | Date publication; data collection year | Sampling Method                                                                     | Sampling method for non-FGM                                                               | Self-report or examination      | Country of origin; Host country (if different) | Region                                       | Total sample size                               | Total FGM                                      | Participant description (representing group being compared)                    | Age Group                                               | Risk of Bias |
|-----------------------|---------------------------------------|----------------------------------------|-------------------------------------------------------------------------------------|-------------------------------------------------------------------------------------------|---------------------------------|------------------------------------------------|----------------------------------------------|-------------------------------------------------|------------------------------------------------|--------------------------------------------------------------------------------|---------------------------------------------------------|--------------|
| <b>African Region</b> |                                       |                                        |                                                                                     |                                                                                           |                                 |                                                |                                              |                                                 |                                                |                                                                                |                                                         |              |
| 1                     | Nonterah, et al. <sup>1</sup>         | 2020; 2003-2013                        | Pregnancy records database.                                                         | Pregnancy records database.                                                               | Examination                     | Ghana                                          | Kassena-Nankana district-North Eastern Ghana | 9306                                            | 1647                                           | Women who delivered at the targeted hospital                                   | Less than 20 to more than 35                            | High         |
| 2                     | Greis, et al. <sup>2</sup>            | 2020; 2017                             | Two-part stratified sampling procedure for villages; a random sample of participant | Those who reported not having FGM or unsure of their FGM status                           | Self-report                     | Burkina Faso                                   | 10 villages and one sector of Nouna town     | 696                                             | 301                                            | Adolescents aged 12-20                                                         | 12-20                                                   | Unclear      |
| 3                     | Njoku, et al. <sup>3</sup>            | 2020; (2018-2019)                      | Hospital-based; systematic sampling                                                 | For each participant with FGM being recruited, 2 consecutive participants were recruited. | Examination                     | Nigeria                                        | Calabar, Nigeria                             | 450                                             | 150                                            | Pregnant women                                                                 | Under 19 to more than 40                                | High         |
| 4                     | Sylla, et al. <sup>4</sup>            | 2020, 2012                             | Multi-facility based; whole sample                                                  | Multi-facility based; whole sample                                                        | Self-report (head of household) | Mali                                           | Bamako                                       | 1920                                            | 1027                                           | Girls aged 0-15                                                                | 0-15                                                    | Unclear      |
| 5                     | Kandala, et al. <sup>5</sup>          | 2019; (Only 2014 used)                 | Multi-stage cluster sampling (DHS)                                                  | Multi-stage cluster sampling (DHS)                                                        | Mother's report                 | Kenya                                          | National                                     | 12,434                                          | 373                                            | Girls of mothers of reproductive age                                           | 0-14                                                    | Low          |
| 6                     | Anikwe, et al. <sup>6</sup>           | 2019; 2012                             | Facility-based; random sampling                                                     | Purposive (women who delivered in the facility within 24 h of selection of a case).       | Examination                     | Nigeria                                        | Abakaliki, Ebonyi, Nigeria                   | 260                                             | 260                                            | Pregnant women                                                                 | Less than 20 to more than 35                            | Unclear      |
| 7                     | Kandala and Shell-Duncan <sup>7</sup> | 2019; (Only 2010-2011 used)            | Multi-stage cluster sampling (DHS)                                                  | Multi-stage cluster sampling (DHS)                                                        | Self-report                     | Senegal                                        | National                                     | 15668                                           | 4408                                           | Women                                                                          | 15-49                                                   | Low          |
| 8                     | Boyle and Svec <sup>8</sup>           | 2019; (2010-2014)                      | Multi-stage cluster sampling (Multiple DHS surveys)                                 | Multi-stage cluster sampling (Multiple DHS surveys)                                       | Mother's report                 | Multiple Countries *                           | NA                                           | 12,144                                          | 6606 **                                        | Women who had daughters aged older than FGM normative age within their regions | Daughters older than normative age in different regions | Unclear      |
| 9                     | Beller and Kröger <sup>9</sup>        | 2018; (2008-2009)                      | Stratified random sampling                                                          | Parents who do not have a daughter with FGM                                               | Parent's report                 | Multiple African countries **                  | Same                                         | Mothers (n= 6,299) and Fathers (n= 6,778)       | Not reported                                   | Parents who have a daughter (study examining daughters with FGM)               | Not indicated                                           | High         |
| 10                    | Sakeah, et al. <sup>10</sup>          | 2018; NA                               | Two-stage sampling method then proximity selection to select subsequent household   | Two-stage sampling method                                                                 | Self-report                     | Ghana                                          | Bawku municipality & Pusiga District         | 830                                             | Pusiga District - 273, Bawku Municipality -236 | Women of reproductive age                                                      | 15-49                                                   | Unclear      |
| 11                    | Ojo and Ijadunola <sup>11</sup>       | 2017, 2013                             | Multistage cluster sampling (DHS)                                                   | Same                                                                                      | Self-report                     | Nigeria                                        | National                                     | 38,948                                          | 9,652                                          | Women of reproductive age                                                      | 15-49                                                   | Low          |
| 12                    | Gebremariam, et al. <sup>12</sup>     | 2016; 2014                             | School-based, multistage stratified random sampling                                 | School-based, multistage stratified random sampling                                       | Self-report                     | Ethiopia                                       | Jigjiga district                             | 662                                             | 538                                            | High school & college students                                                 | 15-24                                                   | Unclear      |
| 13                    | Gajaa, et al. <sup>13</sup>           | 2016; 2014                             | Cluster sampling                                                                    | Women from the sample who do not have a daughter with FGM                                 | Mother's report                 | Ethiopia                                       | Hababo Guduru District                       | 610 Mothers with at least one daughter under 15 | 293 Daughters                                  | Women with at least one daughter under 15 years                                | 0-15                                                    | Low          |
| 14                    | Andualem <sup>14</sup>                | 2016; 2014                             | Household based; systematic random sampling                                         | Household based; systematic random sampling                                               | Mother's report                 | Ethiopia                                       | East Gojjam Zone, Western Amhara             | 805 Daughters                                   | 403 Daughters                                  | Women who had daughters less than 5 years                                      | 0-5                                                     | Unclear      |

|                                    |                                     |                           |                                                                                     |                                                            |                                 |                   |                                                                        |                                                                    |                                                                      |                                                        |                                                                |         |
|------------------------------------|-------------------------------------|---------------------------|-------------------------------------------------------------------------------------|------------------------------------------------------------|---------------------------------|-------------------|------------------------------------------------------------------------|--------------------------------------------------------------------|----------------------------------------------------------------------|--------------------------------------------------------|----------------------------------------------------------------|---------|
| 15                                 | Oljira, et al. <sup>15**</sup>      | 2016; 2013                | Multistage cluster sampling (Harar Health and Demographic Surveillance System 2013) | Multistage cluster sampling                                | Mother's report                 | Ethiopia          | Harar                                                                  | 842 Daughters                                                      | 160 Daughters                                                        | Women with at least one daughter younger than 12 years | 0-12                                                           | Unclear |
| 16                                 | Ashimi, et al. <sup>16</sup>        | 2015; 2014                | Multi-facilities; systematic random sampling                                        | Multi-facilities; systematic random sampling               | Examination and mother's report | Nigeria           | Three clinics, Birnin Kudu, Jigawa state                               | 461 Mothers of infants                                             | 215                                                                  | Infants presenting to clinics                          | Less than 1                                                    | Unclear |
| 17                                 | Ifeanyichukwu, et al. <sup>17</sup> | 2015; 2014                | Household; cluster sampling                                                         | Household; cluster sampling                                | Self-report                     | Nigeria           | Okada Community - Edo State                                            | 325                                                                | 90                                                                   | Women of reproductive age                              | 15-49                                                          | Unclear |
| 18                                 | Chikhungu and Madise <sup>18</sup>  | 2015 (Only DHS 2010 used) | Multistage cluster sampling                                                         | Multistage cluster sampling                                | Self-report                     | Burkina Faso      | National                                                               | 17,807                                                             | 13,551                                                               | Women                                                  | 15-49                                                          | Low     |
| 19                                 | Bogale, et al. <sup>19</sup>        | 2014; 2014                | Household; stratified random sample                                                 | Household; stratified random sample                        | Self-report                     | Ethiopia          | Bale zone                                                              | 634                                                                | 486                                                                  | Childbearing age women                                 | 15-49                                                          | Unclear |
| 20                                 | Besera and Roess <sup>20</sup>      | 2014; 2002                | Multi-stage cluster sampling (DHS)                                                  | Women from the sample who doesn't have a daughter with FGM | Mother's report                 | Eritrea           | National                                                               | 8754 Mothers                                                       | 3168 had at least one daughter with FGM                              | Women with at least one daughter                       | Daughters of women of reproductive age                         | Low     |
| 21                                 | Tamire and Molla <sup>21</sup>      | 2013; 2011                | Multi-school based; multi-staged cluster sampling method                            | Multi-school based; multi-staged cluster sampling method   | Self-report                     | Ethiopia          | Hadiya zone, Southern Ethiopia                                         | 797                                                                | 641                                                                  | High school students                                   | 13-25                                                          | Unclear |
| 22                                 | Bjälkander, et al. <sup>22</sup>    | 2013; (2010-2012)         | Facility-based; Purposive                                                           | Facility-based; Purposive                                  | Self-report and examination     | Sierra Leone      | Northeastern Sierra Leone                                              | 554                                                                | 451                                                                  | Attended antenatal clinics                             | 12-47                                                          | Unclear |
| 23                                 | Garba, et al. <sup>23</sup>         | 2012; 2011                | Hospital-based; purposive                                                           | Hospital-based; purposive                                  | Mother's report                 | Nigeria           | Kano, Northern Nigeria                                                 | 200                                                                | 26                                                                   | Infants in Aminu Kano Teaching Hospital                | Less than 1                                                    | High    |
| 24                                 | Yirga, et al. <sup>24</sup>         | 2012; 2008                | Household; Systematic random sampling                                               | Household; Systematic random sampling                      | Self-report                     | Ethiopia          | Kersa district, East Hararge, Oromia region, Ethiopia                  | 858 mothers (858 daughters) – determinants for both groups studied | Mothers with FGM-792, Mothers with 1 or more daughters with FGM- 288 | Women of reproductive age                              | 15-49                                                          | Unclear |
| 25                                 | Iliyasu, et al. <sup>25</sup>       | 2012; missing             | University-based; multistage sampling                                               | University-based; multistage sampling                      | Self-report                     | Nigeria           | Bayero University, Kano, Kano State, Northern Nigeria                  | 359                                                                | 43                                                                   | University Students                                    | 17-40                                                          | Unclear |
| 26                                 | Mudege, et al. <sup>26</sup>        | 2012; missing             | Community based-every household                                                     | Community based-every household                            | Self-report                     | Kenya             | Korogocho and Viwandani, informal settlements in Nairobi               | 527                                                                | 323                                                                  | Girls/women in informal settlements                    | 12-24                                                          | High    |
| 27                                 | Shay, et al. <sup>27</sup>          | 2010; 2008                | Multi-school-based sample; random sample                                            | Multi-school-based sample; random sample                   | Parent's or families report     | Ethiopia          | Adis Ababa                                                             | 407                                                                | 106                                                                  | School girls                                           | Under 5 to above 20 [the majority were in the age group 10-15] | High    |
| 28                                 | Mitike and Deressa <sup>28</sup>    | 2009; 2004                | Household sample; systematic sampling method                                        | Household sample; systematic sampling method               | Parent's report                 | Somalia; Ethiopia | Somali refugee camps in the Somali Regional State in Eastern Ethiopia. | 288                                                                | 122                                                                  | 492 Parents                                            | 12+                                                            | Unclear |
| 29                                 | Im, et al. <sup>29</sup>            | 2019; 2013                | Snowballing                                                                         | Snowballing                                                | Self-report                     | Somalia; Kenya    | Eastleigh                                                              | 143                                                                | Not reported                                                         | Refugees                                               | 15-35                                                          | High    |
| Eastern Mediterranean Region (EMR) |                                     |                           |                                                                                     |                                                            |                                 |                   |                                                                        |                                                                    |                                                                      |                                                        |                                                                |         |
| 1                                  | Abdulah, et al. <sup>30</sup>       | 2019; 2017                | Two stage random sampling                                                           | Two stage random sampling                                  | Mother's-report                 | Iraq              | Iraqi Kurdistan region (Duhok, Erbil, and Sulaiymani y)                | 5048 daughters                                                     | 2361 daughters                                                       | Mothers and their daughters                            | All age groups                                                 | Unclear |

|                        |                                       |                   |                                                                                                  |                                                                                                     |                                     |                                                       |                                                                      |                                       |                                           |                                                                                        |                                |         |
|------------------------|---------------------------------------|-------------------|--------------------------------------------------------------------------------------------------|-----------------------------------------------------------------------------------------------------|-------------------------------------|-------------------------------------------------------|----------------------------------------------------------------------|---------------------------------------|-------------------------------------------|----------------------------------------------------------------------------------------|--------------------------------|---------|
| 2                      | Rouzi <sup>31</sup>                   | 2019; 2016-2017   | Facility based; purposive                                                                        | Same                                                                                                | Self-report                         | Saudi, Naturalized Saudi, and non-Saudi; Saudi Arabia | Jeddah                                                               | 963                                   | 175                                       | Women attending clinics                                                                | 18-75                          | Unclear |
| 3                      | Alosaimi, et al. <sup>32</sup>        | 2019; (2008-2009) | Multistage sampling                                                                              | Same for women; For daughters, the control group were mothers without a daughter subjected to FGM/C | Mother's report                     | Yemen                                                 | National                                                             | 7076 Women with at least one daughter | Women-3384, Daughters (at least one)-2405 | Women with at least one daughter with FGM                                              | Daughters of mothers           | Unclear |
| 4                      | Minsart, et al. <sup>33</sup>         | 2015; 2012-2014   | Facility-based, whole sample                                                                     | Facility-based, whole sample                                                                        | Examination                         | Djibouti                                              | Djibouti-City                                                        | 614                                   | 643                                       | Mothers of live births and stillbirths (excluding mothers from West Africa and Europe) | Less than 25 till more than 35 | High    |
| 5                      | Elduma <sup>34</sup>                  | 2018; 2014        | Multistage cluster sampling (MICS)                                                               | Multistage cluster sampling (MICS)                                                                  | Self-report                         | Sudan                                                 | National                                                             | 21947                                 | 19451                                     | Women                                                                                  | 15-49                          | Low     |
| 6                      | Ali, et al. <sup>35</sup>             | 2018; 2017        | Cluster and systematic random sampling                                                           | Cluster and systematic random sampling                                                              | Self-report                         | Egypt                                                 | Beni-Suef                                                            | 3353                                  | 1846                                      | Young women                                                                            | 12-25                          | Unclear |
| 7                      | Milaat, et al. <sup>36</sup>          | 2018; 2017        | Cluster random sampling for the region followed by multi-stage random sampling for the household | Cluster random sampling for the region followed by multi-stage random sampling for the household    | Report of the head of the household | Saudi Arabia                                          | Hali semi-urban region.                                              | 218                                   | 175                                       | Girls less than 18 years                                                               | 0-18                           | Unclear |
| 8                      | Arafa, et al. <sup>37</sup>           | 2018; (2016-2017) | University-based sample; multi-stage random sampling                                             | University-based sample; multi-stage random sampling                                                | Self-report                         | Egypt                                                 | Beni-Suef University                                                 | 1723                                  | 815                                       | University Students                                                                    | Mean age=20.89                 | Unclear |
| 9                      | Ahmed, et al. <sup>38</sup>           | 2017; (2015-2016) | Multi-facility; purposive                                                                        | Multi-facility; purposive                                                                           | Self-report                         | Egypt                                                 | Suez Canal University                                                | 204                                   | 135                                       | Students attending clinic                                                              | 14-19                          | Unclear |
| 10                     | Abdel-Aleem, et al. <sup>39</sup>     | 2016; (2011-2014) | Facility based; purposive                                                                        | Facility based; purposive                                                                           | Examination                         | Egypt                                                 | Assiut and Sohag                                                     | 430                                   | 376                                       | Recently married women                                                                 | 17-31                          | High    |
| 11                     | Abolfotouh, et al. <sup>40</sup>      | 2015; (2012-2013) | Organization-based; convenient (google survey)                                                   | Organization-based; convenient                                                                      | Self-report                         | Egypt                                                 | Not Applicable (online)                                              | 320                                   | 47                                        | Medical Students                                                                       | Not indicated                  | High    |
| 12                     | Dehghankh alili, et al. <sup>41</sup> | 2015; (2010-2013) | Multi-facility based; purposive                                                                  | Multi-facility based; purposive                                                                     | Examination                         | Iran                                                  | Hormozgan, Southern Iran                                             | 780                                   | 535                                       | Women and girls attending clinic                                                       | 14-38                          | Unclear |
| 13                     | Mohammed, et al. <sup>42</sup>        | 2014; (2011-2012) | Computer based multi-stage random sampling                                                       | Computer based multi-stage random sampling                                                          | Examination                         | Egypt                                                 | Ismailia                                                             | 2106                                  | 1911                                      | Sexually active women                                                                  | 15-45                          | High    |
| 14                     | Ali, et al. <sup>43</sup>             | 2013; 2012        | Multi-school based; random                                                                       | Multi-school based; random                                                                          | Self-report                         | Sudan                                                 | Kassala, Eastern Sudan                                               | 972                                   | 810                                       | School girls                                                                           | 9-16                           | High    |
| 15                     | Saleem, et al. <sup>44</sup>          | 2013; 2011        | Multi-facility based; purposive                                                                  | Multi-facility based; purposive                                                                     | Self or parent report               | Iraq                                                  | Kurdistan region                                                     | 1508                                  | 348                                       | Females visiting PHCs                                                                  | Up to 20                       | Low     |
| 16                     | Yasin, et al. <sup>45</sup>           | 2013; (2007-2009) | Multi-facility-based sample, a convenient sampling                                               | Multi-facility-based sample, a convenient sampling                                                  | Examination and Self-report         | Iraq                                                  | Erbil, Kurdistan Region, Iraq                                        | 1987                                  | 1397 (self-reported), 1164 (examination)  | Women and girls attending clinic                                                       | 15-49                          | High    |
| 17                     | Zayed and Ali <sup>46</sup>           | 2012; missing     | Community-based; random sample                                                                   | Community-based; random sample                                                                      | Self-report                         | Egypt                                                 | Cairo & Giza                                                         | 244                                   | 156                                       | Muslim females between the age of 5 and 30 years.                                      | Up to 30                       | High    |
| 18                     | Rasheed, et al. <sup>47</sup>         | 2011; (2008-2010) | Multi-facility based; all those presenting to certain clinic                                     | Multi-facility based; all those presenting to certain clinic                                        | Self-report and parent report       | Egypt                                                 | Sohag and Qena                                                       | 4158                                  | 3711                                      | Young women and girls attending clinics                                                | 5-25                           | High    |
| <b>European Region</b> |                                       |                   |                                                                                                  |                                                                                                     |                                     |                                                       |                                                                      |                                       |                                           |                                                                                        |                                |         |
| 1                      | Koschollek, et al. <sup>48</sup>      | 2020; (2015-2016) | Community-based, convenience sampling                                                            | Community-based, convenience sampling                                                               | Self-report                         | Multiple Countries; Germany                           | Six cities Munich, the Rhine-Ruhr region, Cologne, Berlin, Frankfurt | 1044                                  | 281                                       | Migrants from Saharan Africa                                                           | Not indicated                  | High    |

|                        |                                        |                   |                                                       |                                                       |             |                                       |                                                   |                                  |                                            |                                          |                                   |         |
|------------------------|----------------------------------------|-------------------|-------------------------------------------------------|-------------------------------------------------------|-------------|---------------------------------------|---------------------------------------------------|----------------------------------|--------------------------------------------|------------------------------------------|-----------------------------------|---------|
|                        |                                        |                   |                                                       |                                                       |             |                                       | am Main, and the region of Hanover                |                                  |                                            |                                          |                                   |         |
| 2                      | Mbanya, et al. <sup>49</sup>           | 2018; 2014        | Respondent driven sampling                            | Respondent driven sampling                            | Self-report | Somalia; Norway                       | Oslo                                              | 159                              | 82                                         | Migrants                                 | Not indicated                     | High    |
| 3                      | Koukkula, et al. <sup>50</sup>         | 2016; (2010-2012) | National Registry; Random sample                      | National registry; random sample                      | Self-report | Somali or Kurdish origins; Finland    | Helsinki, Espoo, Vantaa, Turku, Tampere, Vaasa    | 389 (224 Kurdish and 165 Somali) | Somali Origins - 50, Kurdish Origins - 153 | Immigrants                               | 18-64                             | High    |
| Region of the Americas |                                        |                   |                                                       |                                                       |             |                                       |                                                   |                                  |                                            |                                          |                                   |         |
| 1                      | Akinsulure-Smith and Chu <sup>51</sup> | 2017; (1996-2014) | Whole database (NYU Program for Survivors of Torture) | Whole database (NYU Program for Survivors of Torture) | Self-report | Multiple countries, USA <sup>#</sup>  | New York                                          | 514                              | 133                                        | African born women, Survivors of Torture | Average age =34.3                 | Unclear |
| 2                      | Chu and Akinsulure-Smith <sup>52</sup> | 2016; 2014        | Community based, convenience                          | Community based, convenience                          | Self-report | Multiple countries <sup>†</sup> ; USA | New York                                          | 68                               | 36                                         | Migrants over 18 years                   | 18+                               | Unclear |
| 3                      | Akinsulure-Smith <sup>53</sup>         | 2012; missing     | Community based; Purposive                            | Community based; Purposive                            | Self-report | Sierra Leon and Liberia; USA          | New York                                          | 23                               | 7                                          | Immigrants from West Africa              | 20-57                             | High    |
| West Pacific Region    |                                        |                   |                                                       |                                                       |             |                                       |                                                   |                                  |                                            |                                          |                                   |         |
| 1                      | Gibson-Helm, et al. <sup>54</sup>      | 2015; (2002-2011) | Whole electronic database                             | Whole electronic database                             | Examination | Multiple Countries; Australia         | North Africa, Middle and East Africa, West Africa | 2173                             | 78                                         | Migrants/ refugees at a pregnancy clinic | From less than 20 to more than 35 | High    |

\* Six DHS surveys: Burkina Faso 2010, Egypt 2014, Guinea 2012, Kenya 2014, Mali 2012-2013, and Nigeria 2013

\*\* Mothers had a daughter subjected to FGM

\*\*\* The survey was conducted in 19 African countries (Botswana, Cameroon, Chad, Democratic Republic of Congo, Djibouti, Ethiopia, Ghana, Guinea Bissau, Kenya, Liberia, Mali, Mozambique, Nigeria, Rwanda, Senegal, South Africa, Tanzania, Uganda, and Zambia)

\*\*\*\*After a close examination of the work-study, we found an error in the calculation of a number of the odds ratios, i.e., the reference category and the reported direction of the odds ratio. Results reported in this manuscript represent corrections to the odds ratio calculations

# Participants from Guinea, Cameroon, Sierra Leone, Zaire/Democratic Republic of Congo, Cote d'Ivoire, Burkina Faso, Congo, Liberia, Mauritania

† Sierra Leone, Guinea, Mali, Gambia

## References

1. Nonterah EA, Kanmiki EW, Agorinya IA, et al. Prevalence and adverse obstetric outcomes of female genital mutilation among women in rural Northern Ghana. *European Journal of Public Health* 2020;30(3):561-67.
2. Greis A, Bärnighausen T, Bountogo M, et al. Attitudes towards female genital cutting among adolescents in rural Burkina Faso: a multilevel analysis. *Tropical Medicine & International Health* 2020;25(1):119-31.
3. Njoku C, Emechebe CI, Njoku A, et al. Obstetric Outcomes of Parturients with Female Genital Mutilation in a Tertiary Hospital in Nigeria. *Research Journal of Obstetrics & Gynecology* 2020;13
4. Sylla M, Léonie F, Diakité F, et al. 1. Aspects épidémiologiques, cliniques, socio-culturels et économiques des mutilations génitales féminines dans le district de Bamako au Mali. *Journal of Obstetrics and Gynaecology Canada* 2020;42(2):e15.
5. Kandala N-B, Nnanatu CC, Atilola G, et al. A spatial analysis of the prevalence of female genital mutilation/cutting among 0–14-year-old girls in Kenya. *International Journal of Environmental Research and Public Health* 2019;16(21):4155.
6. Anikwe CC, Ejikeme BN, Obiechina NJ, et al. Female genital mutilation and obstetric outcome: A cross-sectional comparative study in a tertiary hospital in Abakaliki South East Nigeria. *European Journal of Obstetrics & Gynecology and Reproductive Biology* 2019;1:100005.
7. Kandala N-B, Shell-Duncan B. Trends in female genital mutilation/cutting in Senegal: what can we learn from successive household surveys in sub-Saharan African countries? *International Journal for Equity in Health* 2019;18(1):25.
8. Boyle EH, Svec J. Intergenerational transmission of female genital cutting: community and marriage dynamics. *Journal of Marriage and Family* 2019;81(3):631-47.
9. Beller J, Kröger C. Differential effects from aspects of religion on female genital mutilation/cutting. *Psychology of Religion and Spirituality* 2018;13(4):381–89.
10. Sakeah E, Debpuur C, Oduro AR, et al. Prevalence and factors associated with female genital mutilation among women of reproductive age in the Bawku municipality and Pusiga District of northern Ghana. *BMC Women's Health* 2018;18(1):150.
11. Ojo TO, Ijadunola MY. Sociodemographic factors associated with female genital cutting among women of reproductive age in Nigeria. *The European Journal of Contraception & Reproductive Health Care* 2017;22(4):274-79.
12. Gebremariam K, Assefa D, Weldegebreal F. Prevalence and associated factors of female genital cutting among young adult females in Jijiga district, eastern Ethiopia: a cross-sectional mixed study. *International Journal of Women's Health* 2016;8:357.
13. Gajaa M, Wakgari N, Kebede Y, et al. Prevalence and associated factors of circumcision among daughters of reproductive aged women in the Hababo Guduru District, Western Ethiopia: a cross-sectional study. *BMC Women's Health* 2016;16(1):42.
14. Andualem M. Determinants of female genital mutilation practices in East Gojjam Zone, Western Amhara, Ethiopia. *Ethiopian Medical Journal* 2016;54(3):109-16.
15. Oljira T, Assefa N, Dessie Y. Female genital mutilation among mothers and daughters in Harar, eastern Ethiopia. *International Journal of Gynecology & Obstetrics* 2016;135(3):304-09.
16. Ashimi AO, Amole TG, Iliyasu Z. Prevalence and predictors of female genital mutilation among infants in a semi urban community in northern Nigeria. *Sexual and Reproductive Healthcare* 2015;6(4):243-48.
17. Ifeanyichukwu OA, Oluwaseyi A, Adetunji L. Female genital mutilation: Attitude and practices among women in Okada community, Edo state. *Journal of Medicine & Biomedical Research* 2015;14(2):138-50.
18. Chikhungu LC, Madise NJ. Trends and protective factors of female genital mutilation in Burkina Faso: 1999 to 2010. *International Journal for Equity in Health* 2015;14(1):42.
19. Bogale D, Markos D, Kaso M. Prevalence of female genital mutilation and its effect on women's health in Bale zone, Ethiopia: a cross-sectional study. *BMC Public Health* 2014;14(1):1076.
20. Besera G, Roess A. The relationship between female genital cutting and women's autonomy in Eritrea. *International Journal of Gynecology & Obstetrics* 2014;126(3):235-39.
21. Tamire M, Molla M. Prevalence and belief in the continuation of female genital cutting among high school girls: a cross-sectional study in Hadiya zone, Southern Ethiopia. *BMC Public Health* 2013;13(1):1120.

22. Bjälkander O, Grant DS, Berggren V, et al. Female genital mutilation in Sierra Leone: forms, reliability of reported status, and accuracy of related demographic and health survey questions. *Obstetrics and Gynecology International* 2013;2013:680926
23. Garba ID, Muhammed Z, Abubakar IS, et al. Prevalence of female genital mutilation among female infants in Kano, Northern Nigeria. *Archives of Gynecology and Obstetrics* 2012;286(2):423-28.
24. Yirga WS, Kassa NA, Gebremichael MW, et al. Female genital mutilation: prevalence, perceptions and effect on women's health in Kersa district of Ethiopia. *International Journal of Women's Health* 2012;4:45.
25. Iliyasu Z, Abubakar IS, Galadanci HS, et al. Predictors of female genital cutting among university students in northern Nigeria. *Journal of Obstetrics and Gynaecology* 2012;32(4):387-92. doi: 10.3109/01443615.2012.666582
26. Mudege NN, Egondi T, Beguy D, et al. The determinants of female circumcision among adolescents from communities that practice female circumcision in two Nairobi informal settlements. *Health Sociology Review* 2012;21(2):242-50.
27. Shay TZ, Haidar J, Kogi-Makau W. Magnitude of and driving factors for female genital cutting in schoolgirls in Addis Ababa, Ethiopia: A cross-sectional study. *South African Journal of Child Health* 2010;4(3):78-82.
28. Mitike G, Deressa W. Prevalence and associated factors of female genital mutilation among Somali refugees in eastern Ethiopia: a cross-sectional study. *BMC Public Health* 2009;9(1):264.
29. Im H, Swan LET, Heaton L. Polyvictimization and mental health consequences of female genital mutilation/circumcision (FGM/C) among Somali refugees in Kenya. *Women & Health* 2020;60(6):636-51.
30. Abdulah DM, Sedo BA, Dawson A. Female Genital Mutilation in Rural Regions of Iraqi Kurdistan: A Cross-Sectional Study. *Public Health Reports* 2019;134(5):514-21.
31. Rouzi AA, Berg RC, Alamoudi R, et al. Survey on female genital mutilation/cutting in Jeddah, Saudi Arabia. *BMJ Open*:(5)9;2019 e024684-e84.
32. Alosaimi AN, Essén B, Riitta L, et al. Factors associated with female genital cutting in Yemen and its policy implications. *Midwifery* 2019;74:99-106.
33. Minsart A-F, N'Guyen T-S, Ali Hadji R, et al. Maternal infibulation and obstetrical outcome in Djibouti. *The Journal of Maternal-Fetal & Neonatal Medicine* 2015;28(14):1741-46.
34. Elduma AH. Female genital mutilation in Sudan. *Open Access Macedonian Journal of Medical Sciences* 2018;6(2):430.
35. Ali HAAEW, Arafa AE, Abd Allah NAEF, et al. Prevalence of female circumcision among young women in Beni-Suef, Egypt: a cross-sectional study. *Journal of Pediatric and Adolescent Gynecology* 2018;31(6):571-74.
36. Milaat WA, Ibrahim NK, Albar HM. Reproductive health profile and circumcision of females in the Hali semi-urban region, Saudi Arabia: A community-based cross-sectional survey. *Annals of Saudi medicine* 2018;38(2):81-89.
37. Arafa AE, Elbahrawe RS, Shawky SM, et al. Epidemiological and gynecological correlates with female genital mutilation among Beni-Suef University students; cross sectional study. *Middle East Fertility Society Journal* 2018;23(3):184-88.
38. Ahmed MR, Shaaban MM, Meky HK, et al. Psychological impact of female genital mutilation among adolescent Egyptian girls: a cross-sectional study. *The European Journal of Contraception & Reproductive Health Care* 2017;22(4):280-85.
39. Abdel-Aleem MA, Elkady MM, Hilmy YA. The relationship between female genital cutting and sexual problems experienced in the first two months of marriage. *International Journal of Gynecology & Obstetrics* 2016;132(3):305-08.
40. Abolfotouh SM, Ebrahim AZ, Abolfotouh MA. Awareness and predictors of female genital mutilation/cutting among young health advocates. *International Journal of Women's Health* 2015;7:259.
41. Dehghankhalili M, Fallahi S, Mahmudi F, et al. Epidemiology, regional characteristics, knowledge, and attitude toward female genital mutilation/cutting in southern Iran. *The Journal of Sexual Medicine* 2015;12(7):1577-83.
42. Mohammed GF, Hassan MM, Eyada MM. Female genital mutilation/cutting: will it continue? *The Journal of Sexual Medicine* 2014;11(11):2756-63.
43. Ali AAA, Okud A, Mohammed AA, et al. Prevalence of and factors affecting female genital mutilation among schoolgirls in Eastern Sudan. *International Journal of Gynecology & Obstetrics* 2013;120(3):288-89.
44. Saleem RA, Othman N, Fattah FH, et al. Female genital mutilation in Iraqi Kurdistan: description and associated factors. *Women & Health* 2013;53(6):537-51.

45. Yasin BA, Al-Tawil NG, Shabila NP, et al. Female genital mutilation among Iraqi Kurdish women: a cross-sectional study from Erbil city. *BMC Public Health* 2013;13(1):809.
46. Zayed AA, Ali AA. Abusing female children by circumcision is continued in Egypt. *Journal of Forensic and Legal Medicine* 2012;19(4):196-200.
47. Rasheed SM, Abd-Ellah AH, Yousef FM. Female genital mutilation in Upper Egypt in the new millennium. *International Journal of Gynecology & Obstetrics* 2011;114(1):47-50.
48. Koschollek C, Kuehne A, Müllerschön J, et al. Knowledge, information needs and behavior regarding HIV and sexually transmitted infections among migrants from sub-Saharan Africa living in Germany: Results of a participatory health research survey. *PLOS ONE* 2020;15(1):e0227178.
49. Mbanya VN, Gele AA, Diaz E, et al. Health care-seeking patterns for female genital mutilation/cutting among young Somalis in Norway. *BMC Public Health* 2018;18(1):517.
50. Koukkula M, Keskimäki I, Koponen P, et al. Female genital mutilation/cutting among women of Somali and Kurdish origin in Finland. *Birth* 2016;43(3):240-46.
51. Akinsulure-Smith AM, Chu T. Exploring female genital cutting among survivors of torture. *Journal of Immigrant and Minority Health* 2017;19(3):769-73.
52. Chu T, Akinsulure-Smith AM. Health outcomes and attitudes toward female genital cutting in a community-based sample of West African immigrant women from high-prevalence countries in New York City. *Journal of Aggression, Maltreatment & Trauma* 2016;25(1):63-83.
53. Akinsulure-Smith AM. Exploring Female Genital Cutting Among West African Immigrants. *Journal of Immigrant and Minority Health* 2012;16(3):559-61.
54. Gibson-Helm ME, Teede HJ, Cheng IH, et al. Maternal health and pregnancy outcomes comparing migrant women born in humanitarian and nonhumanitarian source countries: a retrospective, observational study. *Birth* 2015;42(2):116-24.





Supplementary Table 3: The odds ratios and proportions of the main determinants of FGM/C

|                               | Wealth                                                                                                                                                                                                                                         | Mother's education                                                                                                                                                                     | Father's Education                                                                                                                                                                  | Urban vs. Rural                                       | Religion                                                                                                                                                               | FGM family history | Mother's occupation                                                        | Father's occupation | Mother's age | Whether religion requires FGM                                                                                    | Mother's knowledge on FGM | Mothers' perception of FGM | Mother's marital status |
|-------------------------------|------------------------------------------------------------------------------------------------------------------------------------------------------------------------------------------------------------------------------------------------|----------------------------------------------------------------------------------------------------------------------------------------------------------------------------------------|-------------------------------------------------------------------------------------------------------------------------------------------------------------------------------------|-------------------------------------------------------|------------------------------------------------------------------------------------------------------------------------------------------------------------------------|--------------------|----------------------------------------------------------------------------|---------------------|--------------|------------------------------------------------------------------------------------------------------------------|---------------------------|----------------------------|-------------------------|
| Nonterah, et al. <sup>1</sup> |                                                                                                                                                                                                                                                |                                                                                                                                                                                        |                                                                                                                                                                                     |                                                       |                                                                                                                                                                        |                    | <b>Unemployed: 62%</b><br><b>Employed: 38%</b><br><b>P-value &lt;0.001</b> |                     |              |                                                                                                                  |                           |                            |                         |
| Sakeah, et al. <sup>2</sup>   | Poor: Reference<br><br>Middle: 0.98 (0.64-1.48) <sup>a</sup><br><br>Rich: 1.21 (0.80-1.85) <sup>a</sup>                                                                                                                                        |                                                                                                                                                                                        |                                                                                                                                                                                     |                                                       | Religions other than Islam: Reference<br><br>Islam: 1.45 (0.73-2.91) <sup>a</sup>                                                                                      |                    |                                                                            |                     |              |                                                                                                                  |                           |                            |                         |
| Greis, et al. <sup>3</sup>    | Lowest quartile: Reference<br><br>Second quartile: 0.58 (0.26-1.3) <sup>a</sup><br><br>Third quartile: 0.95 (0.63-1.5) <sup>a</sup><br><br>Fourth quartile: 0.78 (0.38-1.58) <sup>a</sup><br><br>Highest quartile 1.66 (0.90-3.8) <sup>a</sup> | None: Reference<br><br>Primary: 0.67 (0.32-1.37) <sup>a</sup><br><br><b>Post-primary: 0.17 (0.07-0.41) <sup>a</sup></b><br><br>Not applicable/no mother: 1.47 (0.63-3.40) <sup>a</sup> | None: Reference: Primary: 0.77 (0.36-1.68) <sup>a</sup><br><br>Post-primary or higher: 0.77 (0.42-1.39) <sup>a</sup><br><br>Not applicable/no father: 1.38 (0.61-1.39) <sup>a</sup> | Urban: Reference Rural: 0.83 (0.63-1.11) <sup>a</sup> | Muslim: Reference<br><br>Catholic: 0.88 (0.55-1.41) <sup>a</sup><br><br>Animest: 1.15 (0.69-1.90) <sup>a</sup><br><br><b>Protestant: 0.18 (0.05-0.63) <sup>a</sup></b> |                    |                                                                            |                     |              | <b>Cutting required: 4.24 (2.05-8.76)</b><br><br>Do not know if cutting is required by religion: 1.20(0.52-2.78) |                           |                            |                         |

|                                       |                                                                                                                                                                                                                        |                                                                                                                            |                                                                              |                                                                 |                                                                                                                             |                                                                                                                |                                                                                                             |                                                                  |                                                                                                                                                                                                                                                     |                                                                                          |  |                                                                                                                                               |                                                                                                                                                |
|---------------------------------------|------------------------------------------------------------------------------------------------------------------------------------------------------------------------------------------------------------------------|----------------------------------------------------------------------------------------------------------------------------|------------------------------------------------------------------------------|-----------------------------------------------------------------|-----------------------------------------------------------------------------------------------------------------------------|----------------------------------------------------------------------------------------------------------------|-------------------------------------------------------------------------------------------------------------|------------------------------------------------------------------|-----------------------------------------------------------------------------------------------------------------------------------------------------------------------------------------------------------------------------------------------------|------------------------------------------------------------------------------------------|--|-----------------------------------------------------------------------------------------------------------------------------------------------|------------------------------------------------------------------------------------------------------------------------------------------------|
| Kandala and Shell-Duncan <sup>4</sup> | Richer: Reference<br><br><b>Poorest: 5.77 (4.55-7.33)</b><br><br><b>Poorer: 3.35 (2.64 -4.27) <sup>a</sup></b><br><br><b>Middle: 2.16 (1.70-2.73) <sup>a</sup></b><br><br><b>Richer: 1.37 (1.05-1.79) <sup>a</sup></b> |                                                                                                                            |                                                                              | Urban: Reference<br><b>Rural: 0.78 (0.70-0.87) <sup>a</sup></b> | Other than Muslims: Reference<br><br><b>Muslims: 2.52 (1.61-3.96) <sup>a</sup></b>                                          |                                                                                                                |                                                                                                             |                                                                  |                                                                                                                                                                                                                                                     |                                                                                          |  |                                                                                                                                               |                                                                                                                                                |
| Kandala, et al. <sup>5</sup>          | Middle: Reference<br><br>Lower Quintile: 1.21 (0.76-1.99)<br><br>Lowest quintile: 0.94 (0.58-1.59)<br><br>Higher quintile: 0.86 (0.43-1.66)<br><br>The highest quintile: 0.45 (0.18-1.00)                              | Higher: Reference<br><br>No education: 1.25 (0.35-3.87)<br><br>Primary: 0.71 (0.19-2.27)<br><br>Secondary 0.76 (0.23-2.46) |                                                                              | Rural: Reference<br>Urban: 1.31 (0.87-1.99)                     | Christian: Reference<br><br><b>Muslim: 5.50 (2.65-10.60) <sup>a</sup></b><br><br>No religion: 1.10 (0.25-3.71) <sup>a</sup> | Mother is not subjected to FGM/C: Reference<br><br>Mother is subjected to FGM/C: 1.97 (0.69-6.01) <sup>a</sup> | Mother's occupation is informal: 1.08 (0.61-1.9)<br><br>Mother is not working: 0.62 (0.3-1.28) <sup>a</sup> |                                                                  | Wife's age is greater than husband: Reference<br><br>Wife is 10 years younger than husband: 0.82 (0.44-1.77)<br><br>Wife is 1-4 years younger: 0.79 (0.37-1.63)<br><br>Wife is 5-9 years younger: 0.47 (0.23-1)<br><br>Wife same age: 0.34 (0.12-1) | FGM required by religion: 1.5 (0.93-2.45)<br><br>FGM not required by religion: Reference |  | Support discontinuation of FGM: Reference<br><br><b>Supports the continuation of FGM: 3.08 (1.76-5.55)</b><br><br>(Depends): 1.37 (0.49-3.26) | Currently married: Reference<br>Currently married: Reference<br><br>Formerly married:<br><br>0.92 (0.79, 1.16)<br><br>Never: 0.94 (0.59, 1.59) |
| Mudege, et al. <sup>6</sup>           |                                                                                                                                                                                                                        | <b>Mother with at least primary level: 0.13 (0.02-0.64) <sup>a</sup></b>                                                   | Has primary education: 1.65 (0.32-8.41) <sup>a</sup>                         |                                                                 |                                                                                                                             |                                                                                                                |                                                                                                             |                                                                  |                                                                                                                                                                                                                                                     |                                                                                          |  |                                                                                                                                               |                                                                                                                                                |
| Milaat, et al. <sup>7</sup>           | Not enough: Reference<br><br>Enough or more: 0.5 (0.19-1.18)                                                                                                                                                           | Less than university: Reference<br><br>University and above: 0.55 (0.27-1.14)                                              | Less than university: Reference<br><br>University and above: 0.6 (0.31-1.18) |                                                                 |                                                                                                                             |                                                                                                                | Professional: 1.8(0.39-8.16)<br><br>Not Professional: Reference                                             | Professional: 1.08(0.48-2.45)<br><br>Not Professional: Reference | Above 18: Reference<br><br>Age of mother at marriage is under 18 years 2.08 (0.69-6.29)                                                                                                                                                             |                                                                                          |  |                                                                                                                                               |                                                                                                                                                |

|                                 |                                                                                                                                                                                    |                                                                                                                                                                                                                                                                                      |  |                                                                     |                                                                                                                                                                                                                                                                                               |                                                              |                                                                                                                                                                       |  |                                                                                                                        |                                                                                                                                                                                                                                                                                                                       |                                                                                                               |                                                                                                                       |                                                                                     |
|---------------------------------|------------------------------------------------------------------------------------------------------------------------------------------------------------------------------------|--------------------------------------------------------------------------------------------------------------------------------------------------------------------------------------------------------------------------------------------------------------------------------------|--|---------------------------------------------------------------------|-----------------------------------------------------------------------------------------------------------------------------------------------------------------------------------------------------------------------------------------------------------------------------------------------|--------------------------------------------------------------|-----------------------------------------------------------------------------------------------------------------------------------------------------------------------|--|------------------------------------------------------------------------------------------------------------------------|-----------------------------------------------------------------------------------------------------------------------------------------------------------------------------------------------------------------------------------------------------------------------------------------------------------------------|---------------------------------------------------------------------------------------------------------------|-----------------------------------------------------------------------------------------------------------------------|-------------------------------------------------------------------------------------|
| Mitike and Deressa <sup>8</sup> |                                                                                                                                                                                    |                                                                                                                                                                                                                                                                                      |  |                                                                     |                                                                                                                                                                                                                                                                                               |                                                              |                                                                                                                                                                       |  |                                                                                                                        |                                                                                                                                                                                                                                                                                                                       | Knew at least one FGM complication: Reference                                                                 |                                                                                                                       |                                                                                     |
|                                 |                                                                                                                                                                                    |                                                                                                                                                                                                                                                                                      |  |                                                                     |                                                                                                                                                                                                                                                                                               |                                                              |                                                                                                                                                                       |  |                                                                                                                        |                                                                                                                                                                                                                                                                                                                       | Parents do not know any of FGM complications: 0.5 (0.2-1.2)                                                   |                                                                                                                       |                                                                                     |
| Oljira, et al. <sup>9</sup>     | Monthly income > 1600: Reference<br><br>≤600: 0.7(0.4-1.2) <sup>a</sup><br><br>Monthly income 601-1000: 1.0(0.6-1.7) <sup>a</sup><br><br>ETB 1001-1600: 1.4 (0.7-2.9) <sup>a</sup> | University level: Reference<br><br>Unable to read and write: 1.1(0.5-2.8) <sup>a</sup><br><br><b>Grade 1-4: 0.4 (0.2-0.9) <sup>a</sup></b><br><br>Grade 5-8: 0.9 (0.4-2.1) <sup>a</sup><br><br>Grade 9-10: 1.3 (0.5-3.5) <sup>a</sup><br><br>Grade 10-12: 0.9 (0.4-2.3) <sup>a</sup> |  |                                                                     | Protestant: Reference<br><br>Muslim: 0.9 (0.4-2.4) <sup>a</sup><br><br>Orthodox: 1.4 (0.7-3.0) <sup>a</sup><br><br>Catholic: 0.5 (0.1-2.3) <sup>a</sup>                                                                                                                                       | <b>Mother subjected to FGM/C: 0.4 (0.2-0.8) <sup>a</sup></b> |                                                                                                                                                                       |  |                                                                                                                        | Less than 24: Reference<br><br>25-29: <b>0.3 (0.1-0.9) <sup>a</sup></b><br><br>30-34: <b>0.1 (0.0-0.5) <sup>a</sup></b><br><br>35-39: <b>0.1 (0.0-0.4) <sup>a</sup></b><br><br>40-44: <b>0.0 (0.0-0.2) <sup>a</sup></b><br><br>45-49: <b>0.0 (0.0-0.1) <sup>a</sup></b><br><br>≥50: <b>0.1 (0.0-0.2) <sup>a</sup></b> |                                                                                                               | Women do not know: Reference<br><br>FGM should continue: 0.9 (0.2-4.7)<br><br>FGM should not continue: 3.5 (0.8-15.9) |                                                                                     |
| Gajaa, et al. <sup>10</sup>     | <555 birr: Reference, 556-1233 birr: 0.91 (0.65-1.51) <sup>a</sup><br><br>>1233 birr: 0.24 (0.05-1.24) <sup>a</sup>                                                                | Illiterate: Reference<br><br><b>Literate: 0.50 (0.28-0.91) <sup>a</sup></b><br><br>Primary and above: 0.42 (0.12-1.42) <sup>a</sup>                                                                                                                                                  |  | Rural: Reference<br><br>Urban: <b>0.30 (0.17-0.51) <sup>a</sup></b> | Mother's religion<br>Orthodox: Reference<br><br>Protestant: 0.98 (0.46-2.09) <sup>a</sup><br><br><b>Traditional: 3.86 (1.14-13.07) <sup>a</sup></b><br><br>Father's religion:<br>Protestant Christian: 0.62 (0.29-1.34) <sup>a</sup><br><br><b>Traditional: 0.22 (0.07-0.74) <sup>a</sup></b> |                                                              | Housewife: Reference<br><br>Student: 2.19(0.27-18.24) <sup>a</sup><br><br>Merchant: 1.71 (0.65-4.52) <sup>a</sup><br><br>Civil Servant: 0.80 (0.15-4.30) <sup>a</sup> |  | 15-29: Reference<br><br>30-39: <b>1.95 (1.15-3.31) <sup>a</sup></b><br><br>40-49: <b>2.56 (1.40-4.69) <sup>a</sup></b> |                                                                                                                                                                                                                                                                                                                       | Mother knew FGM was criminal: Reference<br><br><b>Mother does not know FGM was criminal: 5.00 (3.07-8.19)</b> | <b>Mother have a positive attitude on discouraging FGM: 0.26 (0.16-0.43)</b>                                          | Mother is married: Reference<br><br>Mother is single: 1.36 (0.64-2.89) <sup>a</sup> |

|                                   |                                                                                                                                                                                    |                                                                                                                            |                                                                                                 |                                                                        |                                                                             |  |                                                                            |                                                                             |  |                                                                                                                                                             |  |                                                               |  |
|-----------------------------------|------------------------------------------------------------------------------------------------------------------------------------------------------------------------------------|----------------------------------------------------------------------------------------------------------------------------|-------------------------------------------------------------------------------------------------|------------------------------------------------------------------------|-----------------------------------------------------------------------------|--|----------------------------------------------------------------------------|-----------------------------------------------------------------------------|--|-------------------------------------------------------------------------------------------------------------------------------------------------------------|--|---------------------------------------------------------------|--|
| Gebremariam, et al. <sup>11</sup> |                                                                                                                                                                                    | Secondary:<br>Reference<br><br><b>Illiterate: 2.4 (1.3-4.3) <sup>a</sup></b><br><br>Primary:<br>0.96(0.5-1.7) <sup>a</sup> |                                                                                                 | Urban:<br>Reference<br><br><b>Rural: 4 (2.4-6.8) <sup>a</sup></b>      | All Christian:<br>Reference<br><br><b>Muslim: 3.7 (1.1-12) <sup>a</sup></b> |  |                                                                            |                                                                             |  | <b>FGM required: 1.7 (1.07-2.8) <sup>a</sup></b><br><br>Not required:<br>Reference                                                                          |  |                                                               |  |
| Yirga, et al. <sup>12</sup>       | <u>For mothers:</u><br><br>Not owning a radio:<br>Reference<br><br>Ownership of a radio: 1.187 (0.67–2.07)<br><br><u>For daughters:</u><br>Ownership of a radio: 1.716 (0.98–3.00) |                                                                                                                            |                                                                                                 | Urban:<br>Reference<br><br><b>Rural: 0.116 (0.065–0.207).</b>          |                                                                             |  |                                                                            |                                                                             |  |                                                                                                                                                             |  |                                                               |  |
| Tamire and Molla <sup>13</sup>    |                                                                                                                                                                                    | High school and above:<br>Reference<br><br><b>Under high school: 1.84 (1.10-3.38) <sup>a</sup></b>                         | High school and above:<br>Reference,<br><b>Under high school: 2.04 (1.25-3.09) <sup>a</sup></b> | Urban:<br>Reference,<br>Rural: <b>1.97 (1.25-3.09) <sup>a</sup></b>    | All Christians:<br>Reference,<br><b>Muslims:4.21 (1.01-17.00)</b>           |  | Currently employed:<br>Reference,<br>Farmer: 1.49 (0.63-3.53) <sup>a</sup> | Currently employed:<br>Reference,<br>Farmer: 1.2 (0.47-1.44) a              |  |                                                                                                                                                             |  |                                                               |  |
| Andualem <sup>14</sup>            |                                                                                                                                                                                    | Literate:<br>Reference<br><br><b>Illiterate: 1.64 (1.24-2.36) <sup>a</sup></b>                                             | Literate:<br>Reference<br><br><b>Illiterate: 1.78 (1.38-2.56) <sup>a</sup></b>                  | Urban:<br>Reference<br><br><b>Rural: 1.54 (1.09-2.50) <sup>a</sup></b> |                                                                             |  |                                                                            | Parent's age ≥25:<br>Reference<br><br>Parent's age <25:<br>0.61 (0.52-1.86) |  | Mother knew negative impacts of FGM: 0.89 (0.68-1.49)<br><br>Mother did not know FGM had a negative impact:<br>Reference<br><br>Mother did not know FGM was |  | Married mothers:<br>Reference<br><br>Single: 0.86 [0.66-1.96] |  |

|                                             |                                                                                                                                                                                                                                        |  |  |                                                                 |  |                                                                                                                                                                                                                                                                                                         |  |  |  |  |                                                                                               |  |  |
|---------------------------------------------|----------------------------------------------------------------------------------------------------------------------------------------------------------------------------------------------------------------------------------------|--|--|-----------------------------------------------------------------|--|---------------------------------------------------------------------------------------------------------------------------------------------------------------------------------------------------------------------------------------------------------------------------------------------------------|--|--|--|--|-----------------------------------------------------------------------------------------------|--|--|
|                                             |                                                                                                                                                                                                                                        |  |  |                                                                 |  |                                                                                                                                                                                                                                                                                                         |  |  |  |  | criminalized:<br>Reference<br><br>Mother knew<br>FGM was<br>criminal:<br>0.78 (0.72-<br>1.74) |  |  |
| Elduma <sup>15</sup>                        | Poorest:<br>Reference,<br><b>Second: 1.423</b><br>(1.237-1.635) <sup>a</sup><br><br>Middle: 2.614<br>(2.259-3.026) <sup>a</sup><br><br>Fourth: 1.543<br>(1.257-1.893) <sup>a</sup><br><br>Richest: 0.897<br>(0.662-1.216) <sup>a</sup> |  |  | Rural:<br>Reference,<br>Urban: 1.03<br>(0.90-1.18) <sup>a</sup> |  | Having a<br>daughter<br>subjected to<br>FGM/C:36.8<br>(27.96-48.54) <sup>a</sup>                                                                                                                                                                                                                        |  |  |  |  |                                                                                               |  |  |
| Dehghankh<br>alili, et al.<br><sup>16</sup> |                                                                                                                                                                                                                                        |  |  |                                                                 |  | Family history<br>mother (94.6%)<br><br>P-value<0.001<br><br>Family history<br>(sister): 66.4%<br><br>P-value<0.001<br><br>Family history<br>(grandmother):<br>75%<br><br>Having a<br>mother, sister<br>or<br>grandmother<br>subjected to<br>FGM is<br>significantly<br>associated with<br>the practice |  |  |  |  |                                                                                               |  |  |

|                              |  |                                                                                                                                                                      |                                                                                                                                                                                     |                                                                                                                                                         |  | P-value <0.001                                                                                                                                   |                                       |                                                |  |  |  |  |  |
|------------------------------|--|----------------------------------------------------------------------------------------------------------------------------------------------------------------------|-------------------------------------------------------------------------------------------------------------------------------------------------------------------------------------|---------------------------------------------------------------------------------------------------------------------------------------------------------|--|--------------------------------------------------------------------------------------------------------------------------------------------------|---------------------------------------|------------------------------------------------|--|--|--|--|--|
| Yasin, et al.<br>17          |  | Intermediate school and higher education: Reference<br><br>Illiterate: 1.5 (0.9-2.6)<br><br>Read and write: 1.4 (0.7-2.8)<br><br>Primary: 1.3 (0.7-2.5) <sup>a</sup> | Intermediate school and higher education: Reference<br><br><b>Illiterate: 1.4 (1.1-1.9)</b><br><br>Read and write: 1.6 (1.02-2.5)<br><br>Primary school: 1.3 (0.9-1.8) <sup>a</sup> |                                                                                                                                                         |  | Mother not subjected to FGM/C: Reference<br><br><b>Subjected to FGM/C: 15.1 (10.6-21.6)</b><br><br><b>Don't Know: 7.3 (4.4-12.0)<sup>a</sup></b> |                                       |                                                |  |  |  |  |  |
| Saleem, et al.<br>18         |  | High school/Higher: Reference<br><br><b>Basic education: 3.2 (1.5-6.6)</b><br><br><b>None: 8.00 (3.8-16.5)<sup>a</sup></b>                                           |                                                                                                                                                                                     |                                                                                                                                                         |  |                                                                                                                                                  |                                       |                                                |  |  |  |  |  |
| Ali, et al.<br>19<br>(Egypt) |  | <b>Illiterate: 34.1%</b><br><br><b>Elementary: 25.9%</b><br><br><b>High: 40%</b><br><br><b>Higher level of education is protective</b><br><br><b>P-value&lt;0.01</b> | <b>Illiterate: 22.4%</b><br><br><b>Elementary: 25.9%</b><br><br><b>High: 51.5%</b><br><br><b>Higher level of education is protection</b><br><br><b>P-value&lt;0.01</b>              | <b>Significant difference between urban &amp; rural areas prevalence of FGC in urban is 31.8% whereas in rural it is 75.4%</b><br><br><b>P&lt;0.001</b> |  |                                                                                                                                                  |                                       |                                                |  |  |  |  |  |
| Ali, et al.<br>20<br>(Sudan) |  | <b>Less than secondary: 1.5 (1-2.2)<sup>a</sup></b>                                                                                                                  | <b>More than secondary: Reference</b>                                                                                                                                               | Urban: Reference                                                                                                                                        |  | <b>Presence of sister subjected to FGM/C: 4.3 (3.1-5.9)<sup>a</sup></b>                                                                          | Housewife: 0.8 (0.5-1.5) <sup>a</sup> | Non-skilled worker: 0.7 (0.5-1.1) <sup>a</sup> |  |  |  |  |  |

|                                   |                                                                                             |                                                                                                                        |                                                                                                                                    |                                                                                                                                                                                              |                                                        |  |  |  |  |  |  |  |  |
|-----------------------------------|---------------------------------------------------------------------------------------------|------------------------------------------------------------------------------------------------------------------------|------------------------------------------------------------------------------------------------------------------------------------|----------------------------------------------------------------------------------------------------------------------------------------------------------------------------------------------|--------------------------------------------------------|--|--|--|--|--|--|--|--|
|                                   |                                                                                             |                                                                                                                        | <b>Less than secondary: 2.3 (1.5-3.4) <sup>a</sup></b>                                                                             | Rural: 1 (0.7-1.6) <sup>a</sup>                                                                                                                                                              |                                                        |  |  |  |  |  |  |  |  |
| Arafa, et al. <sup>21</sup>       |                                                                                             | <b>Illiterate: Reference</b><br><br><b>Literate OR:0.8</b>                                                             | <b>Illiterate: Reference</b><br><br><b>Literate OR:0.91</b>                                                                        | <b>Rural: Reference</b><br><br><b>Urban OR: 0.55</b>                                                                                                                                         |                                                        |  |  |  |  |  |  |  |  |
| Mohammed , et al. <sup>22</sup>   |                                                                                             |                                                                                                                        |                                                                                                                                    | <b>Rural: 75% of type I; 66.7% of type II and 0% none.</b><br><br><b>Urban: 25% of type I , 33.3% of type II FGM/C and 100% none.</b><br><br><b>Statistically significant at P &lt; 0.05</b> |                                                        |  |  |  |  |  |  |  |  |
| Abdel-Aleem, et al. <sup>23</sup> |                                                                                             |                                                                                                                        |                                                                                                                                    | Rural: Reference<br><br>Urban: 1.09 (0.61-1.93)                                                                                                                                              |                                                        |  |  |  |  |  |  |  |  |
| Ahmed, et al. <sup>24</sup>       | Economic level low: 64.4%<br><br>Intermediate: 68.7%<br><br>High: 61.4%<br><br>P-value: 0.7 | Illiterate 58.6%<br><br>Primary: 63.8%<br><br>Preparatory: 70.3%<br><br>Secondary: 69.8%<br><br>He<br><br>P-value: 0.8 | Illiterate: 61.8%<br><br>Primary: 65.4%<br><br>Preparatory: 68.8%<br><br>Secondary: 67.4%<br><br>Higher: 67.5%<br><br>P-value: 0.9 | <b>Urban: 43%</b><br><br><b>Rural: 91.8%</b><br><br>Significantly higher among those living in rural areas<br><br>P-value: 0.0001                                                            | Muslim: 66.8%,<br>Christian: 60.0%<br><br>P-value: 0.6 |  |  |  |  |  |  |  |  |



|                                    |                                                                                                                        |                                                                                                                        |                                                                                                                 |                                                                     |                                                                                                                                          |                                                                                                                                                                                            |  |  |                                                                                                                                                           |  |  |  |  |
|------------------------------------|------------------------------------------------------------------------------------------------------------------------|------------------------------------------------------------------------------------------------------------------------|-----------------------------------------------------------------------------------------------------------------|---------------------------------------------------------------------|------------------------------------------------------------------------------------------------------------------------------------------|--------------------------------------------------------------------------------------------------------------------------------------------------------------------------------------------|--|--|-----------------------------------------------------------------------------------------------------------------------------------------------------------|--|--|--|--|
|                                    |                                                                                                                        |                                                                                                                        |                                                                                                                 |                                                                     |                                                                                                                                          |                                                                                                                                                                                            |  |  |                                                                                                                                                           |  |  |  |  |
| Rasheed, et al. <sup>25</sup>      | High socioeconomic status: Reference<br><br><b>Low: 2.06(1.42-3.61)</b><br><br>Moderate: 1.13 (0.88-2.24) <sup>a</sup> | Educated: Reference<br><br><b>Illiterate: 2.16(1.33-2.95)</b><br><br>Can read and write: 1.26 (0.88-2.61) <sup>a</sup> | Educated: Reference<br><br>Illiterate: 1.98(0.56-3.06)<br><br>Can read and write: 1.36 (0.98-2.15) <sup>a</sup> | Urban: Reference,<br><b>Rural: 8.20 (2.77-6.21) <sup>a</sup></b>    | Christian: Reference, Muslim 1.04 (0.91-1.26) <sup>a</sup>                                                                               | Mother not subjected to FGM: Reference<br><br><b>Mother subjected to FGM: 9.12 (2.11-14.09) <sup>a</sup></b><br><br><b>Presence of circumcised sisters: 6.28 (1.18-10.89) <sup>a</sup></b> |  |  |                                                                                                                                                           |  |  |  |  |
| Chikhungu and Madise <sup>26</sup> |                                                                                                                        | No education: Reference<br><br><b>Primary: 0.80 (0.69-0.92) <sup>a</sup></b>                                           |                                                                                                                 | Urban: Reference<br><br><b>Rural: 1.61 (1.20-2.15) <sup>a</sup></b> | Christian: Reference<br><br><b>Muslim: 2.13 (1.86-2.45)</b><br><br><b>Traditional and other religions: 1.44 (1.14-1.82) <sup>a</sup></b> |                                                                                                                                                                                            |  |  |                                                                                                                                                           |  |  |  |  |
| Besera and Roess <sup>27</sup>     |                                                                                                                        | Primary: 1.08 (0.85-1.38)<br><br><b>Greater or equal to secondary: 0.54 (0.36-0.81) <sup>a</sup></b>                   |                                                                                                                 |                                                                     | Muslim: Reference<br><br><b>Christian: 0.60 (0.45-0.79) <sup>a</sup></b>                                                                 | <b>Respondent the mother has FGM: 8.59 (5.63-13.10) <sup>a</sup></b>                                                                                                                       |  |  | Less than 20: Reference<br><br><b>20-29: 2.47 (1.39-4.40)</b><br><br><b>30-39: 5.54 (3.06-10.03)</b><br><br><b>40-49: 11.90 (6.28-22.54) <sup>a</sup></b> |  |  |  |  |

|                                                             |                                                                                                                                                                                                                                                             |                                                                                                                                |  |                                                     |                                |                                                                 |                                     |  |                                                                                                                                        |  |  |                                                                                                             |  |
|-------------------------------------------------------------|-------------------------------------------------------------------------------------------------------------------------------------------------------------------------------------------------------------------------------------------------------------|--------------------------------------------------------------------------------------------------------------------------------|--|-----------------------------------------------------|--------------------------------|-----------------------------------------------------------------|-------------------------------------|--|----------------------------------------------------------------------------------------------------------------------------------------|--|--|-------------------------------------------------------------------------------------------------------------|--|
| <sup>23</sup> Alosaimi, et al. <sup>28</sup><br><br>(Women) | Lowest tertile: Reference<br><br><b>Second tertile: 0.63 (0.55-0.72)</b><br><br><b>Highest tertile: 0.61 (0.53-0.69) <sup>a</sup></b><br><br>Housing quality: second quartile: 1.04(0.92-1.19)<br><br><b>Highest quartile: 1.76(1.55-2.00) <sup>a</sup></b> |                                                                                                                                |  |                                                     |                                |                                                                 |                                     |  |                                                                                                                                        |  |  |                                                                                                             |  |
| Alosaimi, et al. <sup>28</sup><br><br>(Daughter)            | Lowest tertile: Reference<br><br><b>Second tertile: 0.68 (0.57-0.82)</b><br><br><b>Highest tertile: 0.70 (0.59-0.85) <sup>a</sup></b><br><br>Housing quality second quartile: 0.97 (0.81-1.17)<br><br>Highest quartile: 1.18(0.99-1.41) <sup>a</sup>        | <b>Lowest tertile: Reference</b><br><br><b>Second tertile: 0.79 (0.66-0.94)</b><br><br><b>Highest tertile: 0.82(0.69-0.97)</b> |  |                                                     |                                | <b>Mother subjected to FGM/C: 7.40 (6.01-9.13) <sup>a</sup></b> |                                     |  | <b>Mother aged less than 20 years: Reference</b><br><br><b>Aged 20-35: 1.82 (1.51-2.18)</b><br><br><b>Aged 36-49: 1.82 (1.51-2.18)</b> |  |  | Mothers believing that the practice should not continue: Reference<br><br>Should continue: 3.52 (3.10-4.00) |  |
| Boyle and Svec <sup>29</sup>                                | <b>Poorest: Reference</b><br><br><b>Poor: 0.72 (0.59-0.86)</b>                                                                                                                                                                                              | Less than primary: Reference<br><br>Primary: 1.00 (0.84-1.2)                                                                   |  | Rural: Reference,<br><b>Urban: 0.71 (0.55-0.90)</b> | <b>Islam: 4.11 (3.45-4.89)</b> | <b>Mother subjected to FGM/C: 33.58 (25.51-44.21)</b>           | Mother earns cash: 0.99 (0.87-1.13) |  | Mother's age: 0.99 (0.98-1.00)                                                                                                         |  |  |                                                                                                             |  |

|                              |                                                                                                                                                                                  |                                                                                                                  |  |                                                                                                                                                                                                             |                                                                   |  |                                                                                           |  |  |  |  |  |  |  |
|------------------------------|----------------------------------------------------------------------------------------------------------------------------------------------------------------------------------|------------------------------------------------------------------------------------------------------------------|--|-------------------------------------------------------------------------------------------------------------------------------------------------------------------------------------------------------------|-------------------------------------------------------------------|--|-------------------------------------------------------------------------------------------|--|--|--|--|--|--|--|
|                              | <p>Middle: 0.72 (0.59-0.86)</p> <p>Rich: 0.58 (0.47-0.71)</p> <p>Richest: 0.47 (0.36-0.61)</p>                                                                                   | <p>Secondary or higher: 0.62 (0.52-0.75)</p>                                                                     |  |                                                                                                                                                                                                             |                                                                   |  |                                                                                           |  |  |  |  |  |  |  |
| Njoku, et al. <sup>30</sup>  | <p>Social class: low: 47.2%</p> <p>Middle: 26.5%</p> <p>Upper 25%</p> <p>FGM was higher among those from low social class</p>                                                    |                                                                                                                  |  |                                                                                                                                                                                                             |                                                                   |  |                                                                                           |  |  |  |  |  |  |  |
| Anikwe, et al. <sup>31</sup> | <p>Social class 1: 6.8%, Social class 2: 12.9%, Social class 3: 38.8%, Social class 4: 38.3% social class 5: 15.3%, significant at social class 2 and 4</p> <p>P value:0.001</p> |                                                                                                                  |  | <p>Urban: 54.8%</p> <p>Rural: 45.2%</p> <p>P value: 0.012</p> <p>The odds of a woman having FGM in the cohort of women residing in rural communities is 66% more than in the group in urban communities</p> |                                                                   |  |                                                                                           |  |  |  |  |  |  |  |
| Ashimi, et al. <sup>32</sup> |                                                                                                                                                                                  | <p>Formal education (primary or secondary): Reference</p> <p>Informal education (Quranic form of education):</p> |  |                                                                                                                                                                                                             | <p>Islam: 49.8%</p> <p>Christianity: 0%</p> <p>P value: 0.001</p> |  | <p>Mother not employed: Reference</p> <p>Mother employed: 2.89(1.66-5.03)<sup>a</sup></p> |  |  |  |  |  |  |  |

|                                     |  |                                |                                                                                                                                        |                                                                    |                                                                                                                          |  |  |  |  |  |  |  |  |
|-------------------------------------|--|--------------------------------|----------------------------------------------------------------------------------------------------------------------------------------|--------------------------------------------------------------------|--------------------------------------------------------------------------------------------------------------------------|--|--|--|--|--|--|--|--|
|                                     |  | 6.39 (3.99-10.23) <sup>a</sup> |                                                                                                                                        |                                                                    |                                                                                                                          |  |  |  |  |  |  |  |  |
| Ifeanyichukwu, et al. <sup>33</sup> |  |                                |                                                                                                                                        |                                                                    | Not significant,<br>Islam: 28.9%<br>Christianity: 25%<br>African traditional religion (ATR): 10%<br>P-value > 0.99       |  |  |  |  |  |  |  |  |
| Iiyasu, et al. <sup>34</sup>        |  |                                |                                                                                                                                        |                                                                    | Muslim:<br>Reference,<br>Christian: 1.27 (0.55-2.97) <sup>a</sup><br>P-value: >0.99                                      |  |  |  |  |  |  |  |  |
| Garba, et al. <sup>35</sup>         |  |                                | Not significant<br>(Fathers having secondary education and above versus fathers having less than secondary education)<br>P value: 0.18 | Residence (Urban versus rural)<br>Not significant<br>P-value: 0.12 | Not significant<br>(Islam versus Christianity)<br>P value: 0.19                                                          |  |  |  |  |  |  |  |  |
| Koschollek, et al. <sup>36</sup>    |  |                                |                                                                                                                                        |                                                                    | Christian:<br>Reference<br><br><b>Muslim: 3.44 (2.52-4.70)</b><br><br>No, other, or unknown religion:<br>1.24(0.63-2.43) |  |  |  |  |  |  |  |  |

|                                  |  |                                                                                                                                                                                     |                                                                                                                                             |                                                               |                                                                       |                                                                                                      |                                                                                                                                             |  |                                                                                                                  |                                                                                                                                                                                                                   |  |  |  |
|----------------------------------|--|-------------------------------------------------------------------------------------------------------------------------------------------------------------------------------------|---------------------------------------------------------------------------------------------------------------------------------------------|---------------------------------------------------------------|-----------------------------------------------------------------------|------------------------------------------------------------------------------------------------------|---------------------------------------------------------------------------------------------------------------------------------------------|--|------------------------------------------------------------------------------------------------------------------|-------------------------------------------------------------------------------------------------------------------------------------------------------------------------------------------------------------------|--|--|--|
| Beller and Kröger <sup>37</sup>  |  | Mother's increased level of education: 0.72 (0.63-0.82)                                                                                                                             | Father's increased level of education: 0.75 (0.67-0.83)                                                                                     |                                                               |                                                                       |                                                                                                      |                                                                                                                                             |  | Mother's increasing age: 1.12 (1.08-1.29)                                                                        |                                                                                                                                                                                                                   |  |  |  |
| Koukkula, et al. <sup>38</sup>   |  |                                                                                                                                                                                     |                                                                                                                                             |                                                               | Other than Muslim: Reference<br>Muslim: 2.02 (1.12-3.63) <sup>a</sup> |                                                                                                      |                                                                                                                                             |  |                                                                                                                  |                                                                                                                                                                                                                   |  |  |  |
| Shay, et al. <sup>39</sup>       |  | Less than grade 10: 44.3%<br><br>Grade 10 or higher and college level: 18.8%<br><br>Significantly higher for girls of mothers who attained less than grade 10<br><br>P-value: 0.001 | Less than grade 10: 51.3%<br><br>Grade 10 or higher and college level: 20.2%<br><br>Significantly higher at grade 10+<br><br>P-value: 0.001 |                                                               |                                                                       | Mother employed: 22.2%<br><br>Mother not employed: 28.8%<br><br>Not significant<br><br>P-value: 0.08 | Father employed: 24%<br><br>Father not employed: 42.2%<br><br>Significantly higher risk when the father is unemployed<br><br>P-value: 0.009 |  | Mother knew FGC has no religious grounds: 23%<br><br>Mother did not know: 32.3%; significant<br><br>P-value:0.03 | Mother did not know that FGM was harmful: 24.4%<br><br>Mother did not know that FGM was harmful: 50%<br><br>Statistically significantly higher among mothers who do not know FGM is harmful<br><br>P-value: 0.006 |  |  |  |
| Bjälkander, et al. <sup>40</sup> |  |                                                                                                                                                                                     |                                                                                                                                             | Rural: Reference<br><br>Urban : 1.98 (1.21-3.22) <sup>a</sup> | Christian: Reference<br><br>Muslim: 2.0 (1.28-3.39) <sup>a</sup>      |                                                                                                      |                                                                                                                                             |  |                                                                                                                  |                                                                                                                                                                                                                   |  |  |  |

|                                   |                                                                                                                                                                       |                                                                                                                                                                                                                        |                                                                                                                                                                                                                |  |                                                                                                                                                                                            |  |  |  |  |  |  |                                                                                                                                                                                             |  |
|-----------------------------------|-----------------------------------------------------------------------------------------------------------------------------------------------------------------------|------------------------------------------------------------------------------------------------------------------------------------------------------------------------------------------------------------------------|----------------------------------------------------------------------------------------------------------------------------------------------------------------------------------------------------------------|--|--------------------------------------------------------------------------------------------------------------------------------------------------------------------------------------------|--|--|--|--|--|--|---------------------------------------------------------------------------------------------------------------------------------------------------------------------------------------------|--|
| Rouzi, et al.<br>41               | <p>&lt;=US\$1330:<br/>42.3%</p> <p>≈US\$1331–<br/>US\$2665:<br/>32.6%</p> <p>More than<br/>US\$2665:<br/>21.5%</p> <p>More wealth<br/>is a protective<br/>factor.</p> |                                                                                                                                                                                                                        |                                                                                                                                                                                                                |  |                                                                                                                                                                                            |  |  |  |  |  |  |                                                                                                                                                                                             |  |
| Akinslure-<br>Smith 42            |                                                                                                                                                                       |                                                                                                                                                                                                                        |                                                                                                                                                                                                                |  | <p>Female Muslim<br/>participants had<br/>significantly<br/>higher rates of<br/>FGM/C<br/>compared to<br/>female Christian<br/>participants</p> <p>(4 out of 7 verses<br/>2 out of 16)</p> |  |  |  |  |  |  |                                                                                                                                                                                             |  |
| Akinslure-<br>Smith and<br>Chu 43 |                                                                                                                                                                       |                                                                                                                                                                                                                        |                                                                                                                                                                                                                |  | <p>Muslim: 87.9%</p> <p>Christian: 11.4%</p> <p>Other: 0.8%</p> <p>Religion P&lt;0.001</p>                                                                                                 |  |  |  |  |  |  |                                                                                                                                                                                             |  |
| Sylla, et al.<br>44               |                                                                                                                                                                       | <p>Qur'anic: 2.75<br/>(2.00-3.78)</p> <p>Illiterate:<br/>1.05-1.39</p> <p>Primary:<br/>1.244 (1.07-<br/>1.46)</p> <p>Secondary:<br/>0.676 (0.58-<br/>0.79)</p> <p>Higher<br/>education:<br/>0.579 (0.49-<br/>0.69)</p> | <p>Qur'anic 2.206<br/>(1.68-2.9)</p> <p>Illiterate<br/>1.236(1.02-1.5)</p> <p>Primary: 1.29<br/>(1.07-1.56)</p> <p>Secondary:<br/>0.78 (0.67-0.91)</p> <p>Higher<br/>education:<br/>0.579 (0.49-<br/>0.69)</p> |  |                                                                                                                                                                                            |  |  |  |  |  |  | <p>Parents<br/>married:<br/>1.03 (1.01-<br/>1.06)</p> <p>Parents<br/>divorced:<br/>0.71 (0.23-<br/>2.24)</p> <p>Single: 0.58<br/>(0.41-0.81)</p> <p>Widowed:<br/>6.00 (1.35-<br/>26.73)</p> |  |

|                                        |                                                                                                                     |                   |  |                                                          |                                                                                                            |  |  |  |  |  |  |  |  |
|----------------------------------------|---------------------------------------------------------------------------------------------------------------------|-------------------|--|----------------------------------------------------------|------------------------------------------------------------------------------------------------------------|--|--|--|--|--|--|--|--|
|                                        |                                                                                                                     | 0.289 (0.20-0.41) |  |                                                          |                                                                                                            |  |  |  |  |  |  |  |  |
| Ojo and Ijadunola <sup>45</sup>        | Poorer: 1.04 (0.79-1.37)<br>Middle: 0.82 (0.58-1.18)<br>Richer: 0.76 (0.53-1.10)<br><b>Richest 0.59 (0.39-0.82)</b> |                   |  | Rural: reference<br>Urban: 1.12 (0.85-1.46)              | Muslim: 0.72 (0.39-1.33)<br>Other Christians: 0.55 (0.30-1.02)<br>Catholic: 0.59 (0.31-1.12)               |  |  |  |  |  |  |  |  |
| Chu and Akinsulure-Smith <sup>46</sup> | Not significant as reported by the authors                                                                          |                   |  |                                                          |                                                                                                            |  |  |  |  |  |  |  |  |
| Bogale, et al. <sup>47</sup>           |                                                                                                                     |                   |  | Urban: Reference<br>Rural: 3.31 (1.48-7.43) <sup>a</sup> | Protestant: Reference<br>Muslim: 3.55 (1.35- 9.37) <sup>a</sup><br>Orthodox: 1.65 (0.61-4.40) <sup>a</sup> |  |  |  |  |  |  |  |  |

## References

1. Nonterah EA, Kanmiki EW, Agorinya IA, et al. Prevalence and adverse obstetric outcomes of female genital mutilation among women in rural Northern Ghana. *European Journal of Public Health* 2020;30(3):561-67.
2. Sakeah E, Debpuur C, Oduro AR, et al. Prevalence and factors associated with female genital mutilation among women of reproductive age in the Bawku municipality and Pusiga District of northern Ghana. *BMC Women's Health* 2018;18(1):150.
3. Greis A, Bärnighausen T, Bountogo M, et al. Attitudes towards female genital cutting among adolescents in rural Burkina Faso: a multilevel analysis. *Tropical Medicine & International Health* 2020;25(1):119-31.
4. Kandala N-B, Shell-Duncan B. Trends in female genital mutilation/cutting in Senegal: what can we learn from successive household surveys in sub-Saharan African countries? *International Journal for Equity in Health* 2019;18(1):25.
5. Kandala N-B, Nnanatu CC, Atilola G, et al. A spatial analysis of the prevalence of female genital mutilation/cutting among 0–14-year-old girls in Kenya. *International Journal of Environmental Research and Public Health* 2019;16(21):4155.
6. Mudege NN, Egondi T, Beguy D, et al. The determinants of female circumcision among adolescents from communities that practice female circumcision in two Nairobi informal settlements. *Health Sociology Review* 2012;21(2):242-50.
7. Milaat WA, Ibrahim NK, Albar HM. Reproductive health profile and circumcision of females in the Hali semi-urban region, Saudi Arabia: A community-based cross-sectional survey. *Annals of Saudi medicine* 2018;38(2):81-89.
8. Mitike G, Deressa W. Prevalence and associated factors of female genital mutilation among Somali refugees in eastern Ethiopia: a cross-sectional study. *BMC Public Health* 2009;9(1):264.
9. Oljira T, Assefa N, Dessie Y. Female genital mutilation among mothers and daughters in Harar, eastern Ethiopia. *International Journal of Gynecology & Obstetrics* 2016;135(3):304-09.
10. Gajaa M, Wakgari N, Kebede Y, et al. Prevalence and associated factors of circumcision among daughters of reproductive aged women in the Hababo Guduru District, Western Ethiopia: a cross-sectional study. *BMC Women's Health* 2016;16(1):42.
11. Gebremariam K, Assefa D, Weldegebreal F. Prevalence and associated factors of female genital cutting among young adult females in Jigjiga district, eastern Ethiopia: a cross-sectional mixed study. *International Journal of Women's Health* 2016;8:357.
12. Yirga WS, Kassa NA, Gebremichael MW, et al. Female genital mutilation: prevalence, perceptions and effect on women's health in Kersa district of Ethiopia. *International Journal of Women's Health* 2012;4:45.
13. Tamire M, Molla M. Prevalence and belief in the continuation of female genital cutting among high school girls: a cross-sectional study in Hadiya zone, Southern Ethiopia. *BMC Public Health* 2013;13(1):1120.
14. Andualem M. Determinants of female genital mutilation practices in East Gojjam Zone, Western Amhara, Ethiopia. *Ethiopian Medical Journal* 2016;54(3):109-16.
15. Elduma AH. Female genital mutilation in Sudan. *Open Access Macedonian Journal of Medical Sciences* 2018;6(2):430.
16. Dehghankhalili M, Fallahi S, Mahmudi F, et al. Epidemiology, regional characteristics, knowledge, and attitude toward female genital mutilation/cutting in southern Iran. *The Journal of Sexual Medicine* 2015;12(7):1577-83.
17. Yasin BA, Al-Tawil NG, Shabila NP, et al. Female genital mutilation among Iraqi Kurdish women: a cross-sectional study from Erbil city. *BMC Public Health* 2013;13(1):809.
18. Saleem RA, Othman N, Fattah FH, et al. Female genital mutilation in Iraqi Kurdistan: description and associated factors. *Women & Health* 2013;53(6):537-51.
19. Ali HAAEW, Arafa AE, Abd Allah NAEF, et al. Prevalence of female circumcision among young women in Beni-Suef, Egypt: a cross-sectional study. *Journal of Pediatric and Adolescent Gynecology* 2018;31(6):571-74.
20. Ali AAA, Okud A, Mohammed AA, et al. Prevalence of and factors affecting female genital mutilation among schoolgirls in Eastern Sudan. *International Journal of Gynecology & Obstetrics* 2013;120(3):288-89.
21. Arafa AE, Elbahrawe RS, Shawky SM, et al. Epidemiological and gynecological correlates with female genital mutilation among Beni-Suef University students; cross sectional study. *Middle East Fertility Society Journal* 2018;23(3):184-88.
22. Mohammed GF, Hassan MM, Eyada MM. Female genital mutilation/cutting: will it continue? *The Journal of Sexual Medicine* 2014;11(11):2756-63.



23. Abdel-Aleem MA, Elkady MM, Hilmy YA. The relationship between female genital cutting and sexual problems experienced in the first two months of marriage. *International Journal of Gynecology & Obstetrics* 2016;132(3):305-08.
24. Ahmed MR, Shaaban MM, Meky HK, et al. Psychological impact of female genital mutilation among adolescent Egyptian girls: a cross-sectional study. *The European Journal of Contraception & Reproductive Health Care* 2017;22(4):280-85.
25. Rasheed SM, Abd-Ellah AH, Yousef FM. Female genital mutilation in Upper Egypt in the new millennium. *International Journal of Gynecology & Obstetrics* 2011;114(1):47-50.
26. Chikhungu LC, Madise NJ. Trends and protective factors of female genital mutilation in Burkina Faso: 1999 to 2010. *International Journal for Equity in Health* 2015;14(1):42.
27. Besera G, Roess A. The relationship between female genital cutting and women's autonomy in Eritrea. *International Journal of Gynecology & Obstetrics* 2014;126(3):235-39.
28. Alosaimi AN, Essén B, Riitta L, et al. Factors associated with female genital cutting in Yemen and its policy implications. *Midwifery* 2019;74:99-106.
29. Boyle EH, Svec J. Intergenerational transmission of female genital cutting: community and marriage dynamics. *Journal of Marriage and Family* 2019;81(3):631-47.
30. Njoku C, Emechebe CI, Njoku A, et al. Obstetric Outcomes of Parturients with Female Genital Mutilation in a Tertiary Hospital in Nigeria. *Research Journal of Obstetrics & Gynecology* 2020;13
31. Anikwe CC, Ejikeme BN, Obiechina NJ, et al. Female genital mutilation and obstetric outcome: A cross-sectional comparative study in a tertiary hospital in Abakaliki South East Nigeria. *European Journal of Obstetrics & Gynecology and Reproductive Biology* 2019;1:100005.
32. Ashimi AO, Amole TG, Iliyasu Z. Prevalence and predictors of female genital mutilation among infants in a semi urban community in northern Nigeria. *Sexual and Reproductive Healthcare* 2015;6(4):243-48.
33. Ifeanyiichukwu OA, Oluwaseyi A, Adetunji L. Female genital mutilation: Attitude and practices among women in Okada community, Edo state. *Journal of Medicine & Biomedical Research* 2015;14(2):138-50.
34. Iliyasu Z, Abubakar IS, Galadanci HS, et al. Predictors of female genital cutting among university students in northern Nigeria. *Journal of Obstetrics and Gynaecology* 2012;32(4):387-92. doi: 10.3109/01443615.2012.666582
35. Garba ID, Muhammed Z, Abubakar IS, et al. Prevalence of female genital mutilation among female infants in Kano, Northern Nigeria. *Archives of Gynecology and Obstetrics* 2012;286(2):423-28.
36. Koschollek C, Kuehne A, Müllerschön J, et al. Knowledge, information needs and behavior regarding HIV and sexually transmitted infections among migrants from sub-Saharan Africa living in Germany: Results of a participatory health research survey. *PLOS ONE* 2020;15(1):e0227178.
37. Beller J, Kröger C. Differential effects from aspects of religion on female genital mutilation/cutting. *Psychology of Religion and Spirituality* 2018;13(4):381-89.
38. Koukkula M, Keskimäki I, Koponen P, et al. Female genital mutilation/cutting among women of Somali and Kurdish origin in Finland. *Birth* 2016;43(3):240-46.
39. Shay TZ, Haidar J, Kogi-Makau W. Magnitude of and driving factors for female genital cutting in schoolgirls in Addis Ababa, Ethiopia: A crosssectional study. *South African Journal of Child Health* 2010;4(3):78-82.
40. Bjälkander O, Grant DS, Berggren V, et al. Female genital mutilation in Sierra Leone: forms, reliability of reported status, and accuracy of related demographic and health survey questions. *Obstetrics and Gynecology International* 2013;2013:680926
41. Rouzi AA, Berg RC, Alamoudi R, et al. Survey on female genital mutilation/cutting in Jeddah, Saudi Arabia. *BMJ Open* 2019;9(5):e024684-e84.
42. Akinsulure-Smith AM. Exploring Female Genital Cutting Among West African Immigrants. *Journal of Immigrant and Minority Health* 2012;16(3):559-61.
43. Akinsulure-Smith AM, Chu T. Exploring female genital cutting among survivors of torture. *Journal of Immigrant and Minority Health* 2017;19(3):769-73.
44. Sylla M, Léonie F, Diakité F, et al. 1. Aspects épidémiologiques, cliniques, socio-culturels et économiques des mutilations génitales féminines dans le district de Bamako au Mali. *Journal of Obstetrics and Gynaecology Canada* 2020;42(2):e15.
45. Ojo TO, Ijadunola MY. Sociodemographic factors associated with female genital cutting among women of reproductive age in Nigeria. *The European Journal of Contraception & Reproductive Health Care* 2017;22(4):274-79.

46. Chu T, Akinsulure-Smith AM. Health outcomes and attitudes toward female genital cutting in a community-based sample of West African immigrant women from high-prevalence countries in New York City. *Journal of Aggression, Maltreatment & Trauma* 2016;25(1):63-83.
47. Bogale D, Markos D, Kaso M. Prevalence of female genital mutilation and its effect on women's health in Bale zone, Ethiopia: a cross-sectional study. *BMC Public Health* 2014;14(1):1076.

**Supplementary Table 4: Other FGM determinants identified in included studies.**

| Determinant                                                          | Study                        | Unadjusted Odds Ratio (95% CI) | Adjusted Odds Ratio (95% CI)                         | Proportions as reported by authors                                                                                                                                                                                        |
|----------------------------------------------------------------------|------------------------------|--------------------------------|------------------------------------------------------|---------------------------------------------------------------------------------------------------------------------------------------------------------------------------------------------------------------------------|
| Living grandmother                                                   | Ali, et al. <sup>1</sup>     |                                | <b>7.1 (4.6–10.8)</b>                                |                                                                                                                                                                                                                           |
| Living conditions                                                    | Im, et al. <sup>2</sup>      |                                | <b>Living separately from home: 0.16 (0.05-0.52)</b> |                                                                                                                                                                                                                           |
|                                                                      | Shay, et al. <sup>3</sup>    |                                |                                                      | Live with father only: 34.8%<br>Living with mother only: 32%<br><b>Living with both: 12.4%</b><br>Living with relatives: 48.5%<br>→ FGM statistically significantly lower when living with both parents<br>P value: 0.001 |
| Polyvictimization                                                    | Im, et al. <sup>2</sup>      |                                | <b>1.23 (1.07-1.40)</b>                              |                                                                                                                                                                                                                           |
| Village FGC rate (higher)                                            | Greis, et al. <sup>4</sup>   |                                | <b>1.63 (1.40-1.90)</b>                              |                                                                                                                                                                                                                           |
| Percentage of Muslims in the village (higher)                        | Greis, et al. <sup>4</sup>   | <b>1.24 (1.01–1.51)</b>        |                                                      |                                                                                                                                                                                                                           |
| Presence of community norms that are not significant: Domestic abuse | Kandala, et al. <sup>5</sup> |                                |                                                      | Not significant<br>No: Reference<br>Wife Beating for Going Out: 1.00 (0.68-1.45)<br>Wife Beating for Neglecting the Children: 1.51 (1.06-2.2)<br>Wife Beating for Arguing with the Husband: 1.03 (0.67-1.56)              |

|                                    |                              |                                                                                                                                                                                                                                                                                                                                                                                                                                                                                                                                                                                                      |  |                                                                                                                             |
|------------------------------------|------------------------------|------------------------------------------------------------------------------------------------------------------------------------------------------------------------------------------------------------------------------------------------------------------------------------------------------------------------------------------------------------------------------------------------------------------------------------------------------------------------------------------------------------------------------------------------------------------------------------------------------|--|-----------------------------------------------------------------------------------------------------------------------------|
|                                    |                              |                                                                                                                                                                                                                                                                                                                                                                                                                                                                                                                                                                                                      |  | Wife Beating for Denying Husband Sex:<br>0.79 (0.53-1.19)<br><br>Wife Beating for Denying Husband Food:<br>0.82 (0.48-1.36) |
| Cultural influence*                | Andualem <sup>6</sup>        | <b>1.60 (1.25-2.53)</b>                                                                                                                                                                                                                                                                                                                                                                                                                                                                                                                                                                              |  |                                                                                                                             |
| Mother's decision-making and power | Kandala, et al. <sup>5</sup> | Mother owns house: 1.75 (1.14-2.86)<br><br>Mother owns land: 0.75 (0.48-1.16)<br><br><b><u>Father Beats Mother</u></b><br><br>No: Reference<br><br>Yes: 1.21 (0.77-1.82)<br><br>Missing/Not available: 1.01<br><br><b><u>Who makes large household purchases?</u></b><br><br>Alone: Reference<br><br>Husband/Partner: 1.4 (0.85-2.13)<br><br>With Husband/partner: 0.91 (0.57-1.41)<br><br><b><u>Who decides on wife's expenditures?</u></b><br><br>Alone: Reference<br><br>Husband/partner: 0.52 (0.2-1.32)<br><br>With her husband: 0.68 (0.39-1.18)<br><br>Missing/not available: 0.9 (0.53-1.48) |  |                                                                                                                             |

|                                      |                                 |                                                                                                                                                 |                        |                                                                                                  |
|--------------------------------------|---------------------------------|-------------------------------------------------------------------------------------------------------------------------------------------------|------------------------|--------------------------------------------------------------------------------------------------|
|                                      |                                 | <u>Who Makes Decision on Mother's Health</u><br>Alone: Reference<br>Husband/Partner: 1.17 (0.77-1.86)<br>With husband/partner: 0.92 (0.62-1.41) |                        |                                                                                                  |
|                                      | Boyle and Svec <sup>7</sup>     |                                                                                                                                                 |                        | Mother's autonomous decisions: 1.02 (0.95-1.10)<br>Mother takes joint decision: 0.98 (0.93-1.03) |
| Parent's increased age               | Mitike and Deressa <sup>8</sup> |                                                                                                                                                 | <b>6.65 (2.6-16.7)</b> |                                                                                                  |
| Father's increased age               | Beller and Kröger <sup>9</sup>  | 1.10 (1.06-1.13)                                                                                                                                |                        |                                                                                                  |
| Father's religion                    | Gajaa, et al. <sup>10</sup>     | Orthodox: Reference<br>Protestant Christian: 0.62 (0.29-1.34).<br><b>Traditional: 0.22 (0.07-0.74)</b>                                          |                        |                                                                                                  |
| Participation in anti-FGM activities | Mitike and Deressa <sup>8</sup> | Participation of the parents in anti-FGM activities: <b>0.3 (0.2-0.6)</b>                                                                       |                        |                                                                                                  |
|                                      | Andualem <sup>6</sup>           | <b>Participation in anti FGM interventions: 0.42 (0.29-0.62)</b><br><b>Received health education on FGM: 0.39 (0.38-0.76)</b>                   |                        |                                                                                                  |
|                                      | Mudege, et al. <sup>11</sup>    |                                                                                                                                                 | Since birth: Reference |                                                                                                  |

|                                   |                                  |                                                                                                                                                                                                                                                                                                                   |                                                                                                                                               |  |
|-----------------------------------|----------------------------------|-------------------------------------------------------------------------------------------------------------------------------------------------------------------------------------------------------------------------------------------------------------------------------------------------------------------|-----------------------------------------------------------------------------------------------------------------------------------------------|--|
| Movement from one area to another |                                  |                                                                                                                                                                                                                                                                                                                   | Came to Demographic Surveillance Area: 1.50 (0.53-4.30)                                                                                       |  |
|                                   | Mbanya, et al. <sup>12</sup>     |                                                                                                                                                                                                                                                                                                                   | <b>Age at migration to Norway is <math>\geq 12</math> years: 4.78 (1.53-15.00)</b><br><br>Age at migration to Norway is 0-11 years: Reference |  |
| Health system related factors     | Koschollek, et al. <sup>13</sup> | <b>No health insurance or medical treatment voucher for asylum seekers or unknown: 1.6 (1.13-2.25)</b>                                                                                                                                                                                                            |                                                                                                                                               |  |
|                                   | Ashimi, et al. <sup>14</sup>     | <u>Type of health facility where the infants received care</u><br><br>Primary healthcare facility: Reference<br><br>Secondary facility: 0.73 (0.45-1.18)<br><br><b>Tertiary healthcare facility: 0.49 (0.26-0.92)</b>                                                                                             |                                                                                                                                               |  |
| Other religion related factors    | Beller and Kröger <sup>9</sup>   | <b>Mother's private prayer frequency: 0.93 (0.87-0.99)</b><br><br><b>Father's private prayer frequency: 0.92 (0.87-0.98)</b><br><br><u>Perceived religious suppression:</u><br><br>Mother: 1.03 (0.88-1.19)<br><br>Father: 1.10 (1.06-1.13)<br><br><u>Parent's religion (unaffiliated as the reference group)</u> |                                                                                                                                               |  |

|               |                                |                                                                                                                                                                                                                                                                                                                                                                                                                                                                                                                                                                                                                                            |                                                                                                                                |  |
|---------------|--------------------------------|--------------------------------------------------------------------------------------------------------------------------------------------------------------------------------------------------------------------------------------------------------------------------------------------------------------------------------------------------------------------------------------------------------------------------------------------------------------------------------------------------------------------------------------------------------------------------------------------------------------------------------------------|--------------------------------------------------------------------------------------------------------------------------------|--|
|               |                                | <p><b>Mother Christian Affiliation: 0.47 (0.25-0.90)</b></p> <p>Father Christian Affiliation: 1.06 (0.59-1.90)</p> <p><b>Mother Traditional Affiliation: 10.57 (4.79-23.31)</b></p> <p><b>Father Traditional affiliation: 9.78 (5-18.78)</b></p> <p>Mother Muslim affiliation: 0.79 (0.41-1.52)</p> <p>Father Muslim Affiliation: 1.66 (0.91-3.02)</p> <p><u>Governmental unfairness towards one's own religious group</u></p> <p><b>Mother: 1.18 (1.08-1.29)</b></p> <p><b>Father: 1.24 (1.15-1.35)</b></p> <p>Father's religious service attendance: 0.98 (0.87-1.09)</p> <p>Mother's religious service attendance: 1.10 (1.02-1.18)</p> |                                                                                                                                |  |
| Consanguinity | Alosaimi, et al. <sup>15</sup> |                                                                                                                                                                                                                                                                                                                                                                                                                                                                                                                                                                                                                                            | <p><u>Odds of experiencing FGM among daughters</u></p> <p><b>Marriage with a second cousin or closer: 1.18 (1.03-1.35)</b></p> |  |
|               | Milaat, et al. <sup>16</sup>   | No parental consanguinity: Reference                                                                                                                                                                                                                                                                                                                                                                                                                                                                                                                                                                                                       |                                                                                                                                |  |

|                                   |                                  |                                                                                                                                                                                                                                           |                                                                                                          |                                                                                                                                                 |
|-----------------------------------|----------------------------------|-------------------------------------------------------------------------------------------------------------------------------------------------------------------------------------------------------------------------------------------|----------------------------------------------------------------------------------------------------------|-------------------------------------------------------------------------------------------------------------------------------------------------|
|                                   |                                  | Parental Consanguinity: 1.7 (0.86-3.3)                                                                                                                                                                                                    |                                                                                                          |                                                                                                                                                 |
| Family factors                    | Sylla, et al. <sup>17</sup>      | <p><b>For girls from a polygamous household: 1.37 (1.23-1.53)</b></p> <p>Mothers in a monogamous union: 0.78 (0.72-0.85)</p> <p><b>Belonging to big family: 1.37 (1.28-1.47)</b></p> <p>Belonging to nuclear family: 0.59 (0.53-0.67)</p> |                                                                                                          |                                                                                                                                                 |
|                                   | Kandala, et al. <sup>5</sup>     | <p><b>Mother is in a polygamous union: 1.23 (0.86-1.69)</b></p> <p><b>Marriage by arrangement: 0.89 (0.65-1.2)</b></p>                                                                                                                    |                                                                                                          |                                                                                                                                                 |
| Child marriage                    | Alosaimi, et al. <sup>15</sup>   |                                                                                                                                                                                                                                           | <p><u>Odds of experiencing FGM among daughters</u></p> <p>Underage marriage: <b>1.60 (1.38-1.84)</b></p> |                                                                                                                                                 |
| Maternal place of birth or origin | Abolfotouh, et al. <sup>18</sup> |                                                                                                                                                                                                                                           |                                                                                                          | <p><b>FGM prevalence among females of rural origin: 25%</b></p> <p><b>FGM prevalence among females of non-rural origin: 10.8% (P=0.001)</b></p> |
|                                   | Iliyasu, et al. <sup>19</sup>    |                                                                                                                                                                                                                                           | <p><u>Geographic origin:</u></p> <p>North-west: Reference</p> <p>Northeast: 0.87 (0.41-2.70)</p>         |                                                                                                                                                 |



|                 |                                   |                                          |                                                                                                                             |                                                                                                                                                                                                                                                                                                                                                                                                                                  |
|-----------------|-----------------------------------|------------------------------------------|-----------------------------------------------------------------------------------------------------------------------------|----------------------------------------------------------------------------------------------------------------------------------------------------------------------------------------------------------------------------------------------------------------------------------------------------------------------------------------------------------------------------------------------------------------------------------|
|                 |                                   |                                          | North central: 1.23 (0.54-5.03)<br><b>South-west: 2.31 (1.13-2.14)</b><br><b>Southeast or South-South: 3.78 (1.21-4.99)</b> |                                                                                                                                                                                                                                                                                                                                                                                                                                  |
|                 | Gibson-Helm, et al. <sup>20</sup> |                                          |                                                                                                                             | <u>FGM/C among women from North Africa</u><br>North Africa Non-humanitarian source countries group: 0.5%<br>North Africa HSC: 5.1%<br>P-value <0.001<br><br><u>Among women from Middle and East Africa</u><br>Middle and East Africa non- HSCs: 0.3%<br>Middle and East Africa HSCs: 13.8%<br>P-value <0.001<br><br><u>Among women from West Africa</u><br>West Africa HSCs: 3.3%,<br>West Africa Non-HSCs: 6.7%<br>P-value=0.65 |
|                 | Yasin, et al. <sup>21</sup>       | Urban: Reference<br>Rural: 1.0 (0.8-1.2) |                                                                                                                             |                                                                                                                                                                                                                                                                                                                                                                                                                                  |
| Maternal Origin | Minsart, et al. <sup>22</sup>     |                                          |                                                                                                                             | <u>Maternal Origin</u> P value<0.00001                                                                                                                                                                                                                                                                                                                                                                                           |

|             |                               |  |  |                                                                                                                                                                                                                                                                                                                                                                                                                                                                                                                                                            |
|-------------|-------------------------------|--|--|------------------------------------------------------------------------------------------------------------------------------------------------------------------------------------------------------------------------------------------------------------------------------------------------------------------------------------------------------------------------------------------------------------------------------------------------------------------------------------------------------------------------------------------------------------|
|             |                               |  |  | <p>Djibouti-Somali: 1.7% No FGM, 0.2% for type I FGM, 58.2% for type II, and 40% for infibulated</p> <p>Djibouti-Afar: 0% No FGM, 6.7% for Type I, 40% for type II, 53.3% for infibulated</p> <p>Djibouti Arabic: 21.2% No FGM, 3% for type I, 57.6% for type II, 18.2% for infibulated</p> <p>Somalia: 0% No FGM, 0% for type I, 38.5% for type II, and 61.5% for infibulated</p> <p>Ethiopia: 28% No FGM, 16% for type I, 52% for type II, and 4% for infibulated</p> <p>Yemen: 28.6% No FGM, 0% for type I, 74% for type II, and 0% for infibulated</p> |
| Residence   | Zayed and Ali <sup>23</sup>   |  |  | <p><u>Residence (of the participant subjected to FGM/C)</u></p> <p>Giza: 64.4%</p> <p>Cairo: 62.5%</p> <p>P- value: 0.781</p>                                                                                                                                                                                                                                                                                                                                                                                                                              |
|             | Abdulah, et al. <sup>24</sup> |  |  | <p>Governorate of residence was significantly associated with FGM among daughters</p> <p>P value &lt;0.001</p>                                                                                                                                                                                                                                                                                                                                                                                                                                             |
| Nationality | Rouzi, et al. <sup>25</sup>   |  |  | <p><b>Saudi: 49.7%</b></p> <p><b>Saudi (natural): 13.1%</b></p> <p><b>Non-Saudi: 37.2%</b></p> <p><b>P value &lt;0.001</b></p>                                                                                                                                                                                                                                                                                                                                                                                                                             |

|                              |                                        |  |                                                                                                                             |                                                                                                                                                                                                                                                                                                                                                          |
|------------------------------|----------------------------------------|--|-----------------------------------------------------------------------------------------------------------------------------|----------------------------------------------------------------------------------------------------------------------------------------------------------------------------------------------------------------------------------------------------------------------------------------------------------------------------------------------------------|
| Immigration status           | Akinsulure-Smith and Chu <sup>26</sup> |  |                                                                                                                             | <p><b>Undocumented: 43.7%</b></p> <p><b>Refugee, asylee, TPS, withholding of removal: 10.1%</b></p> <p><b>Has applied or intends to apply for asylum: 29.5%</b></p> <p><b>US citizen, permanent resident, valid visa: 4.7%</b></p> <p><b>Others: 8.5%</b></p> <p><b>→ Statistically significantly higher among undocumented<br/>P value&lt;0.001</b></p> |
| Living in camp               | Im, et al. <sup>2</sup>                |  | <p><b>Living outside the camp: Reference</b></p> <p><b>Living in camp: 1.54 (0.5-4.74)</b></p>                              |                                                                                                                                                                                                                                                                                                                                                          |
| Duration of stay in the camp | Mitike and Deressa <sup>8</sup>        |  | <p>Duration of stay in the camp &lt;10 years: Reference</p> <p>Duration of stay in the camp &gt;10 years: 0.5 (0.1-1.5)</p> |                                                                                                                                                                                                                                                                                                                                                          |
| Islamic sects                | Dehghankhalili, et al. <sup>27</sup>   |  |                                                                                                                             | <p><b>Shiaa Islam: 51.4%</b></p> <p><b>Sunni Islam: 48.6%</b></p> <p><b>P-value: 0.019</b></p>                                                                                                                                                                                                                                                           |

\*Defined as normal community practices. Results highlighted in bold are statistically significant.

Brackets report 95% Confidence intervals.

## References

1. Ali AAA, Okud A, Mohammed AA, et al. Prevalence of and factors affecting female genital mutilation among schoolgirls in Eastern Sudan. *International Journal of Gynecology & Obstetrics* 2013;120(3):288-89.
2. Im H, Swan LET, Heaton L. Polyvictimization and mental health consequences of female genital mutilation/circumcision (FGM/C) among Somali refugees in Kenya. *Women & Health* 2020;60(6):636-51.
3. Shay TZ, Haidar J, Kogi-Makau W. Magnitude of and driving factors for female genital cutting in schoolgirls in Addis Ababa, Ethiopia: A cross-sectional study. *South African Journal of Child Health* 2010;4(3):78-82.
4. Greis A, Bärnighausen T, Bountogo M, et al. Attitudes towards female genital cutting among adolescents in rural Burkina Faso: a multilevel analysis. *Tropical Medicine & International Health* 2020;25(1):119-31.
5. Kandala N-B, Nnanatu CC, Atilola G, et al. A spatial analysis of the prevalence of female genital mutilation/cutting among 0–14-year-old girls in Kenya. *International Journal of Environmental Research and Public Health* 2019;16(21):4155.
6. Andualem M. Determinants of female genital mutilation practices in East Gojjam Zone, Western Amhara, Ethiopia. *Ethiopian Medical Journal* 2016;54(3):109-16.
7. Boyle EH, Svec J. Intergenerational transmission of female genital cutting: community and marriage dynamics. *Journal of Marriage and Family* 2019;81(3):631-47.
8. Mitike G, Deressa W. Prevalence and associated factors of female genital mutilation among Somali refugees in eastern Ethiopia: a cross-sectional study. *BMC Public Health* 2009;9(1):264.
9. Beller J, Kröger C. Differential effects from aspects of religion on female genital mutilation/cutting. *Psychology of Religion and Spirituality* 2018;13(4):381–89.
10. Gajaa M, Wakgari N, Kebede Y, et al. Prevalence and associated factors of circumcision among daughters of reproductive aged women in the Hababo Guduru District, Western Ethiopia: a cross-sectional study. *BMC Women's Health* 2016;16(1):42.
11. Mudege NN, Egondi T, Beguy D, et al. The determinants of female circumcision among adolescents from communities that practice female circumcision in two Nairobi informal settlements. *Health Sociology Review* 2012;21(2):242-50.
12. Mbanya VN, Gele AA, Diaz E, et al. Health care-seeking patterns for female genital mutilation/cutting among young Somalis in Norway. *BMC Public Health* 2018;18(1):517.
13. Koschollek C, Kuehne A, Müllerschön J, et al. Knowledge, information needs and behavior regarding HIV and sexually transmitted infections among migrants from sub-Saharan Africa living in Germany: Results of a participatory health research survey. *PLOS ONE* 2020;15(1):e0227178.
14. Ashimi AO, Amole TG, Iliyasu Z. Prevalence and predictors of female genital mutilation among infants in a semi urban community in northern Nigeria. *Sexual and Reproductive Healthcare* 2015;6(4):243-48.
15. Alosaimi AN, Essén B, Riitta L, et al. Factors associated with female genital cutting in Yemen and its policy implications. *Midwifery* 2019;74:99-106.
16. Milaat WA, Ibrahim NK, Albar HM. Reproductive health profile and circumcision of females in the Hali semi-urban region, Saudi Arabia: A community-based cross-sectional survey. *Annals of Saudi medicine* 2018;38(2):81-89.
17. Sylla M, Léonie F, Diakité F, et al. 1. Aspects épidémiologiques, cliniques, socio-culturels et économiques des mutilations génitales féminines dans le district de Bamako au Mali. *Journal of Obstetrics and Gynaecology Canada* 2020;42(2):e15.
18. Abolfotouh SM, Ebrahim AZ, Abolfotouh MA. Awareness and predictors of female genital mutilation/cutting among young health advocates. *International Journal of Women's Health* 2015;7:259.
19. Iliyasu Z, Abubakar IS, Galadanci HS, et al. Predictors of female genital cutting among university students in northern Nigeria. *Journal of Obstetrics and Gynaecology* 2012;32(4):387-92. doi: 10.3109/01443615.2012.666582
20. Gibson-Helm ME, Teede HJ, Cheng IH, et al. Maternal health and pregnancy outcomes comparing migrant women born in humanitarian and nonhumanitarian source countries: a retrospective, observational study. *Birth* 2015;42(2):116-24.
21. Yasin BA, Al-Tawil NG, Shabila NP, et al. Female genital mutilation among Iraqi Kurdish women: a cross-sectional study from Erbil city. *BMC Public Health* 2013;13(1):809.
22. Minsart A-F, N'Guyen T-S, Ali Hadji R, et al. Maternal infibulation and obstetrical outcome in Djibouti. *The Journal of Maternal-Fetal & Neonatal Medicine* 2015;28(14):1741-46.
23. Zayed AA, Ali AA. Abusing female children by circumcision is continued in Egypt. *Journal of Forensic and Legal Medicine* 2012;19(4):196-200.

24. Abdulah DM, Sedo BA, Dawson A. Female Genital Mutilation in Rural Regions of Iraqi Kurdistan: A Cross-Sectional Study. *Public Health Reports* 2019;134(5):514-21.
25. Rouzi AA, Berg RC, Alamoudi R, et al. Survey on female genital mutilation/cutting in Jeddah, Saudi Arabia. *BMJ Open* 2019;9(5):e024684-e84.
26. Akinsulure-Smith AM, Chu T. Exploring female genital cutting among survivors of torture. *Journal of Immigrant and Minority Health* 2017;19(3):769-73.
27. Dehghankhalili M, Fallahi S, Mahmudi F, et al. Epidemiology, regional characteristics, knowledge, and attitude toward female genital mutilation/cutting in southern Iran. *The Journal of Sexual Medicine* 2015;12(7):1577-83.
